# Supplementary material for: Magnetic MCM-41 nanoparticles as a support for the immobilization of a palladium organometallic catalyst and its application in C–C coupling reactions
Source: Royal Society of Chemistry journal article supplement (doi:10.1039/c9nj02727k), 2019-01-01

## Supplementary Data

### **Magnetic MCM-41 nanoparticles as support for the immobilization of organometallic catalyst of palladium and its application in C-C coupling reactions**

**Bahman Tahmasbi\*, Arash Ghorbani-Choghamarani**

*Department of Chemistry, Faculty of Science, Ilam University, P.O. Box 69315516, Ilam, Iran.*

*E-mail address: bah.tahmasbi@gmail.com*

#### **Abstract:**

In this work, surface of magnetic MCM-41 nanoparticles (MCM-41/Fe<sub>3</sub>O<sub>4</sub>) modified by 3-aminopropyltriethoxysilane (APTES) and further 1-methyl imidazole was anchored on its surface using cyanuric chloride as linker. Then, palladium nanoparticles were immobilized on the surface of modified MCM-41/Fe<sub>3</sub>O<sub>4</sub> (Pd-im-CC@MCM-41/Fe<sub>3</sub>O<sub>4</sub>) and further its application was studied as magnetically recyclable nanocatalyst in carbon-carbon coupling reactions between wide range of aryl halides and butyl acrylate, methyl acrylate, acrylonitrile, phenylboronic acid, or 3,4-difluorophenylboronic acid under phosphine-free ligand and air atmosphere. This catalyst has advantages of both Fe<sub>3</sub>O<sub>4</sub> nanoparticles and mesoporous MCM-41. Catalyst structure was characterized using SEM, EDS, WDX, N<sub>2</sub> adsorption-desorption isotherms, XRD, TGA, FT-IR, and AAS techniques. All products from carbon-carbon coupling reaction were obtained with excellent yields and high TON and TOF values, which were indicate the high efficiency and activity of this catalyst. Heterogeneity and stability of Pd-im-CC@MCM-41/Fe<sub>3</sub>O<sub>4</sub> was studied by AAS technique, leaching test and poisoning test.

---

\* Address correspondence to B. Tahmasbi, Department of Chemistry, Ilam University, P.O. Box 69315516, Ilam, Iran; Tel/Fax: +98 841 2227022; E-mail address: [bah.tahmasbi@gmail.com](mailto:bah.tahmasbi@gmail.com)

## Experimental details

### *Preparation of the catalyst*

In the first step, amino-functionalized magnetic MCM-41 nanoparticles ( $\text{nPr-NH}_2\text{@MCM-41/Fe}_3\text{O}_4$ ) prepared according to new reported procedure [44]. In the next step, 1 g of  $\text{nPr-NH}_2\text{@MCM-41/Fe}_3\text{O}_4$  was dispersed in toluene and mixed with 2.5 mmol of cyanuric chloride (CC). Then, this mixture was stirred under reflux conditions for 24 h. The resulting solid ( $\text{CC@MCM-41/Fe}_3\text{O}_4$ ) was separated using assistance of external magnet, washed with ethanol and dried at room temperature. Then,  $\text{CC@MCM-41/Fe}_3\text{O}_4$  (1g) was dispersed in 50 mL toluene by sonication for 20 min, and 1-methylimidazole (5 mmol) was added to the reaction mixture. The reaction mixture was stirred under reflux conditions for 24 h under  $\text{N}_2$  atmosphere. The resulting nanoparticles ( $\text{imi-CC@MCM-41/Fe}_3\text{O}_4$ ) were washed with ethanol for several times and separated *via* magnetic decantation and dried at 50 °C. In the final step, 0.5 g of  $\text{imi-CC@MCM-41/Fe}_3\text{O}_4$  and 0.25 g of palladium acetate were dispersed in DMSO for 20 min and stirred under  $\text{N}_2$  atmosphere at room temperature for 3 h and was allowed to continue for 12 h at 60 °C. The reaction mixture was allowed to continue for 4 h at 100 °C. The final product ( $\text{Pd-imi-CC@MCM-41/Fe}_3\text{O}_4$ ) was separated by magnetic decantation and washed by ethanol and water to remove the unattached substrates and dried at room temperature.

### *General procedure for Suzuki reaction catalyzed by Pd-imi-CC@MCM-41/Fe<sub>3</sub>O<sub>4</sub>*

A mixture of aryl halide (1 mmol), 1 mmol of phenylboronic acid ( $\text{PhB(OH)}_2$ ) or 3,4-difluoro phenylboronic acid (3,4-diF- $\text{PhB(OH)}_2$ ),  $\text{Na}_2\text{CO}_3$  (3 mmol, 0.318 g), and  $\text{Pd-imi-CC@MCM-41/Fe}_3\text{O}_4$  (0.008 g, 1.5 mol%) was stirred in PEG-400 (1 mL) at 80 °C and the progress of the reaction was monitored by TLC. After completion of the reaction, the mixture was cooled down,  $\text{Pd-imi-CC@MCM-41/Fe}_3\text{O}_4$  was separated using an external magnet and washed with ethyl acetate. The remaining reaction mixture was extracted with  $\text{H}_2\text{O}$  and ethyl acetate. The organic layer was dried over anhydrous  $\text{Na}_2\text{SO}_4$  (1.5 g). Then ethyl acetate was evaporated and pure biphenyl derivatives were obtained in 85 to 98% of yields.

### *General procedure for Heck reaction catalyzed by Pd-imi-CC@MCM-41/Fe<sub>3</sub>O<sub>4</sub>*

A mixture of aryl halide (1 mmol), 1.2 mmol of alkene (butyl acrylate, methyl acrylate or acrylonitrile),  $\text{Na}_2\text{CO}_3$  (3 mmol, 0.318 g), and  $\text{Pd-imi-CC@MCM-41/Fe}_3\text{O}_4$  (0.012 g, 2.27 mol%) was stirred in PEG-400 (1 mL) at 120 °C and the progress of the reaction was monitored by TLC. After completion of the reaction, the mixture was cooled down to room temperature,  $\text{Pd-imi-CC@MCM-41/Fe}_3\text{O}_4$  was separated using an external magnet and washed with diethyl ether. Then, the reaction mixture was extracted with  $\text{H}_2\text{O}$  and diethyl ether. The organic layer was dried over anhydrous  $\text{Na}_2\text{SO}_4$  (1.5 g). The diethyl ether was evaporated and pure products were obtained in 88 to 98% of yields.

# <sup>1</sup>H NMR spectral data

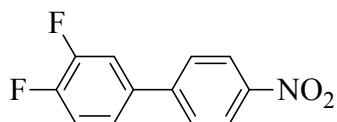

**3,4-Difluoro-4'-nitro-1,1'-biphenyl:** <sup>1</sup>H NMR (400 MHz, CDCl<sub>3</sub>): δ<sub>H</sub>= 8.36-8.32 (dt, *J*= 8.8 Hz, *J*= 2 Hz, 2H), 7.73-7.70 (dt, *J*= 8.8 Hz, *J*= 2 Hz, 2H), 7.50-7.45 (m, 1H), 7.41-7.37 (m, 1H), 7.36-7.31 (m, 1H), ppm.

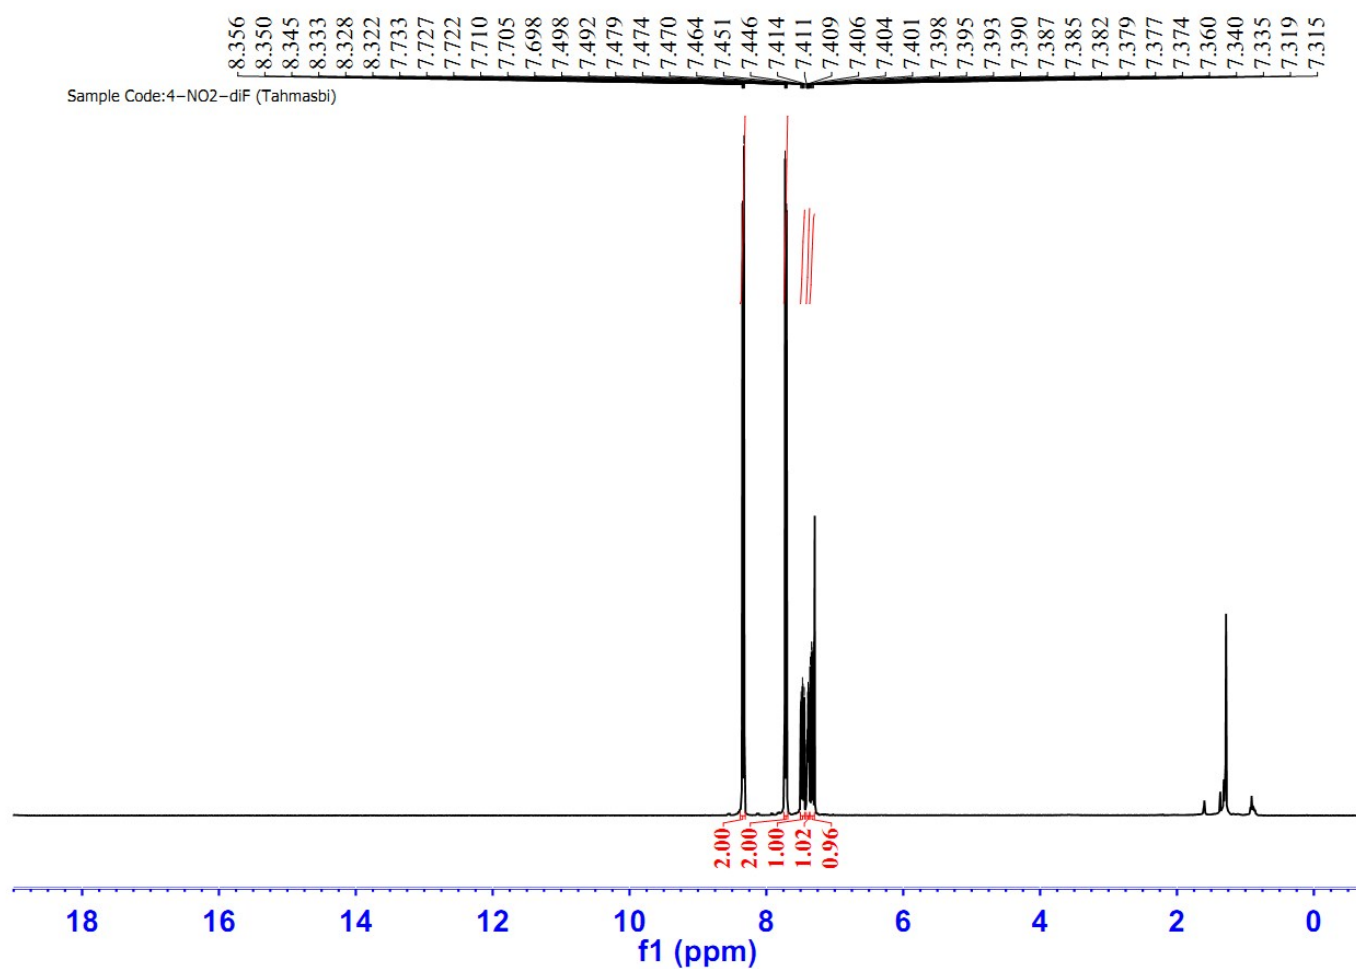

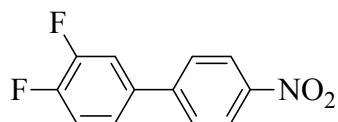

**3,4-Difluoro-4'-nitro-1,1'-biphenyl:**  $^{13}\text{C}$  NMR (100 MHz,  $\text{CDCl}_3$ ):  $\delta_{\text{H}} = 152.2, 152.1, 152.0, 151.9, 149.7, 149.6, 149.5, 149.4, 147.4, 145.4, 135.9, 135.84, 135.82, 135.7, 127.7, 124.3, 123.63, 123.60, 123.57, 123.54, 118.2, 118.0, 116.6, 116.4$  ppm.

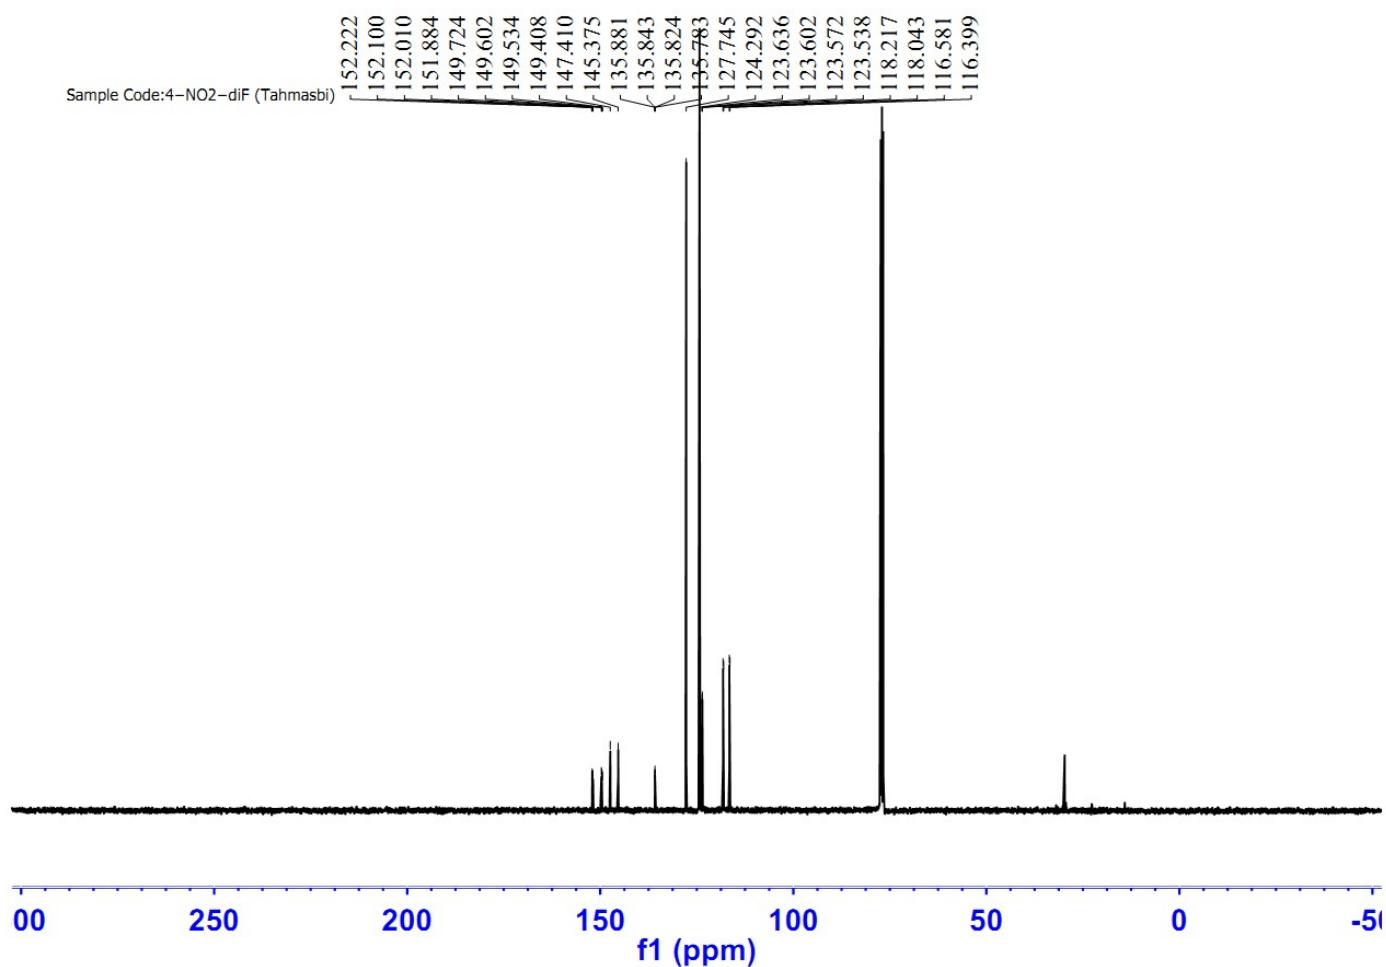

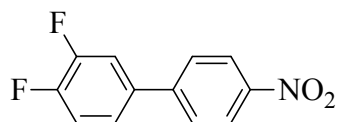

**3,4-Difluoro-4'-nitro-1,1'-biphenyl:**  $^{19}\text{F}$  NMR (400 MHz,  $\text{CDCl}_3$ ):  $\delta_{\text{H}} = -136.2$  (d, 1F),  $-137.1$  (d, 1F) ppm.

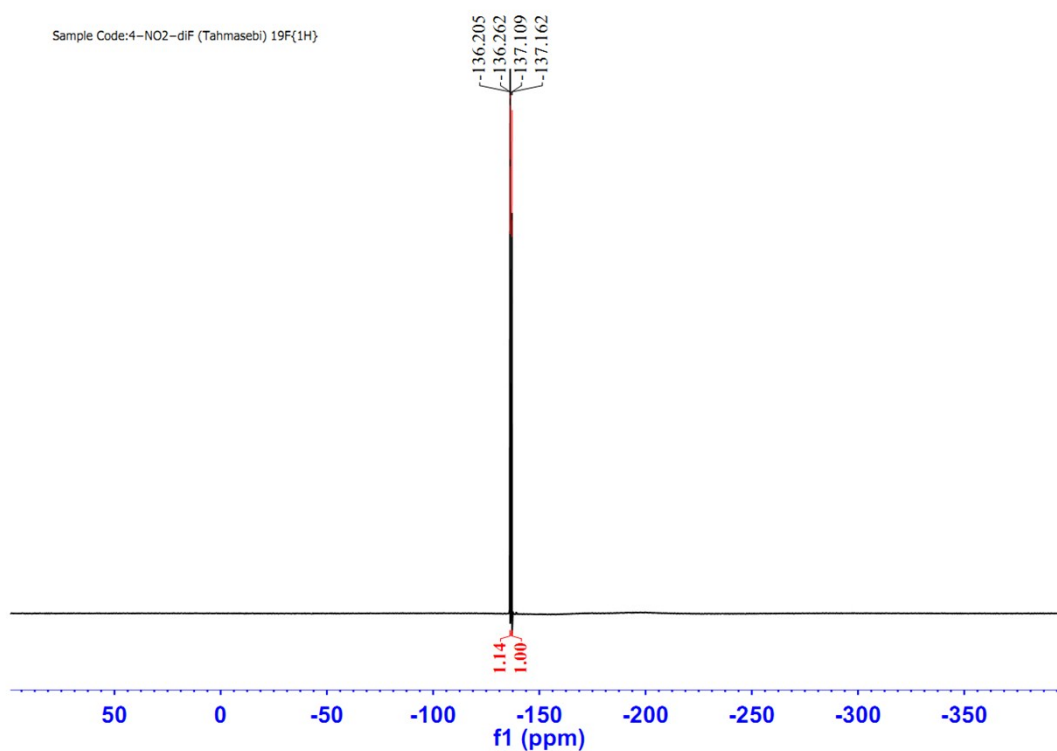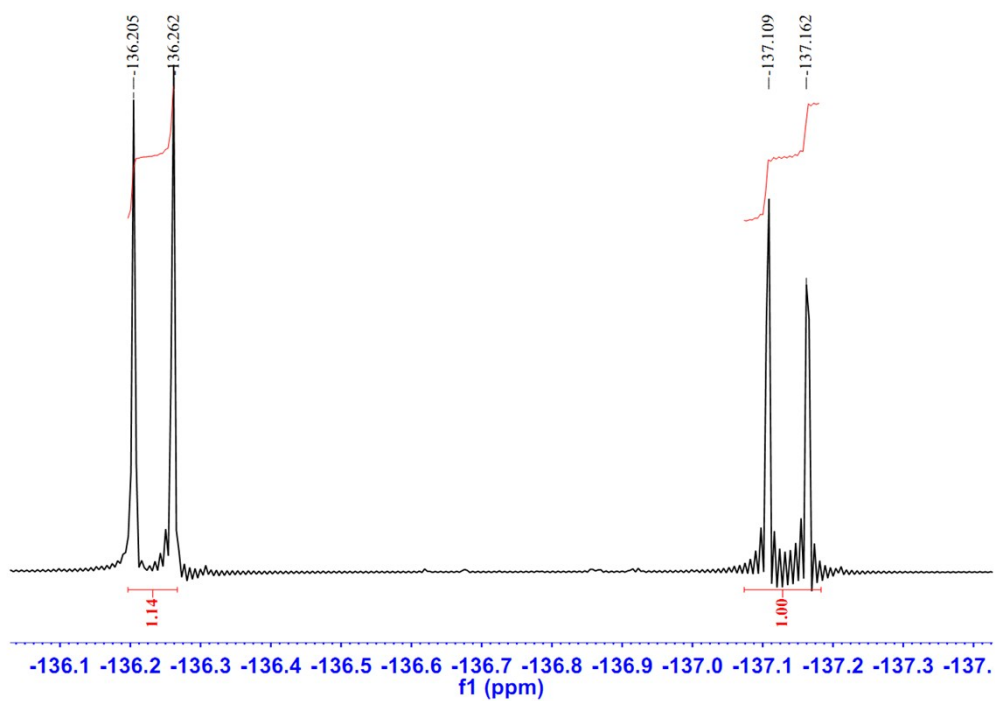

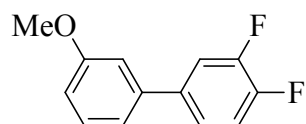

**3,4-Difluoro-3'-methoxy-1,1'-biphenyl:**  $^1\text{H}$  NMR (400 MHz,  $\text{CDCl}_3$ ):  $\delta_{\text{H}}$  = 7.44-7.38 (dd,  $J$  = 8 Hz,  $J$  = 4 Hz, 2H), 7.35-7.32 (m, 1H), 7.29-7.24 (m, 1H), 7.16-7.13 (d,  $J$  = 12 Hz, 1H), 7.10 (s, 1H), 6.97-6.95 (d,  $J$  = 8 Hz, 1H), 3.91 (s, 3H) ppm.

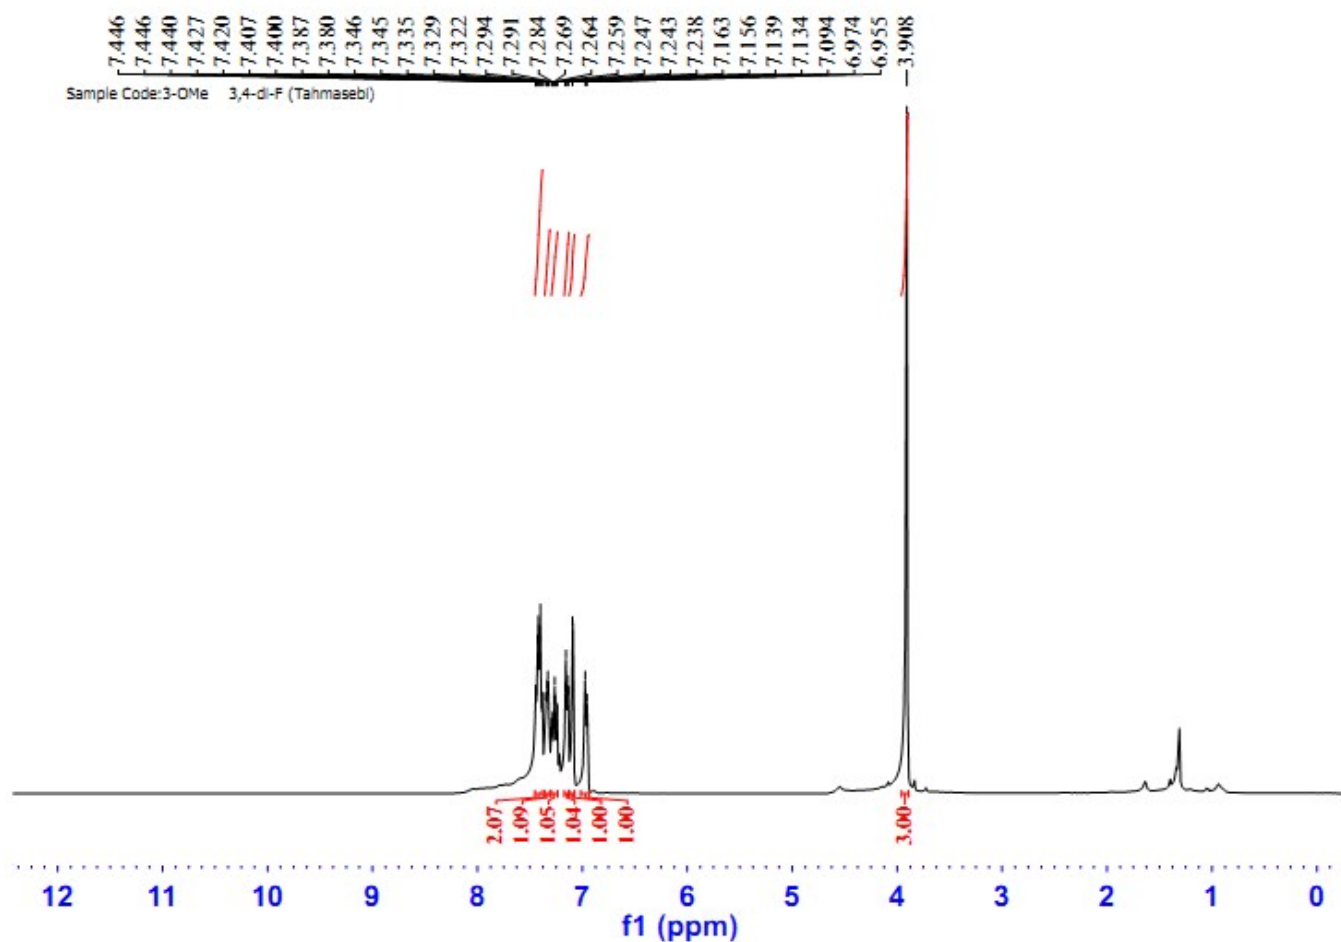

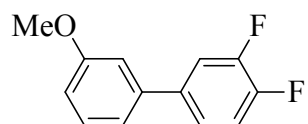

**3,4-Difluoro-3'-methoxy-1,1'-biphenyl:**  $^{13}\text{C}$  NMR (100 MHz,  $\text{CDCl}_3$ ):  $\delta$  = 160.0, 151.8, 151.3, 151.2, 149.3, 148.8, 148.7, 140.6, 138.2, 130.0, 123.1, 123.0, 119.4, 117.6, 117.4, 116.2, 116.0, 113.1, 112.8, 55.3 ppm.

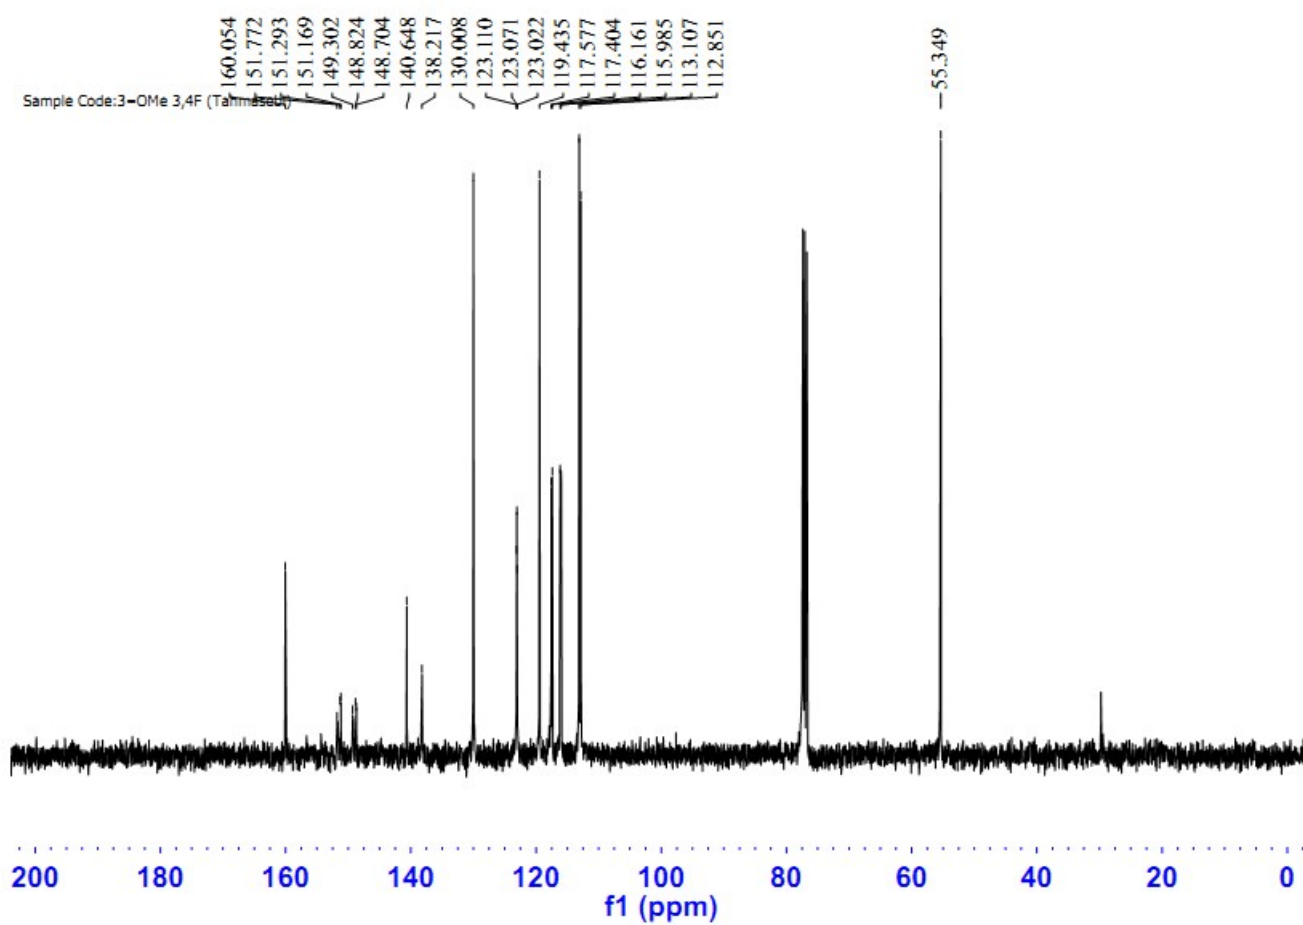

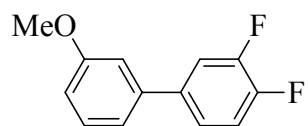

**3,4-Difluoro-3'-methoxy-1,1'-biphenyl:**  $^{19}\text{F}$  NMR (400 MHz,  $\text{CDCl}_3$ ):  $\delta_{\text{H}} = -137.7$  (d, 1F),  $-140.2$  (d, 1F) ppm.

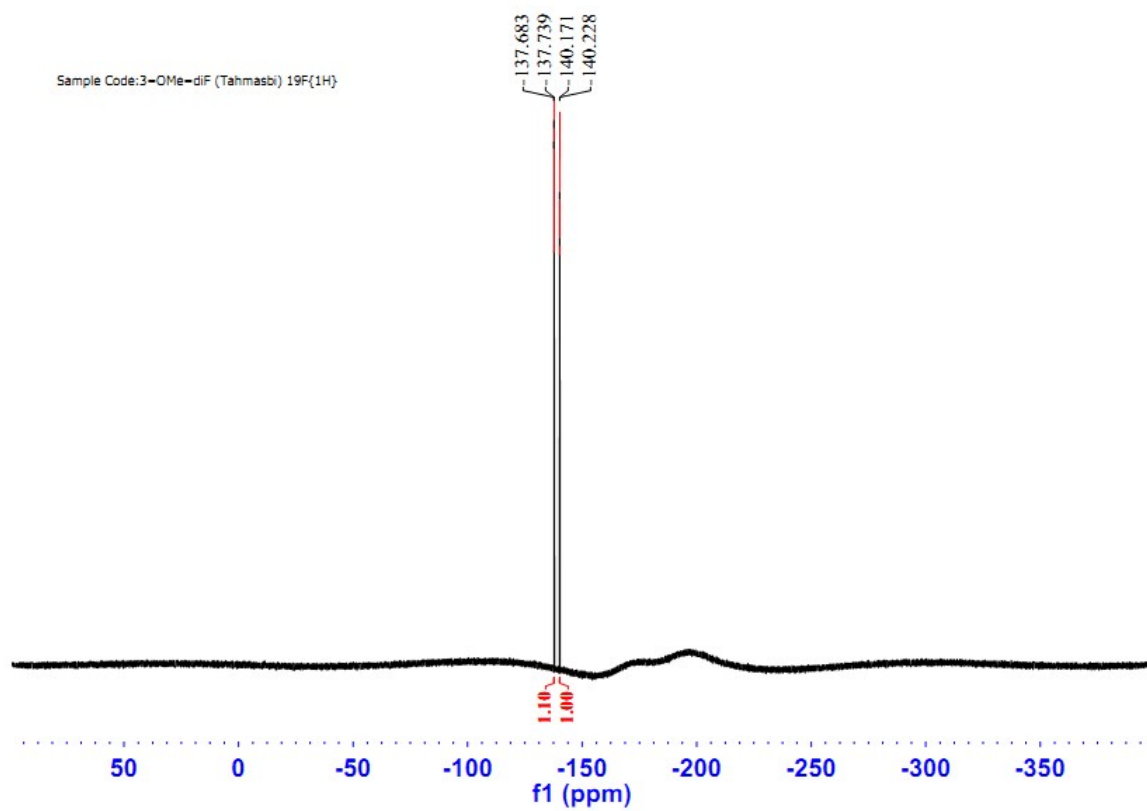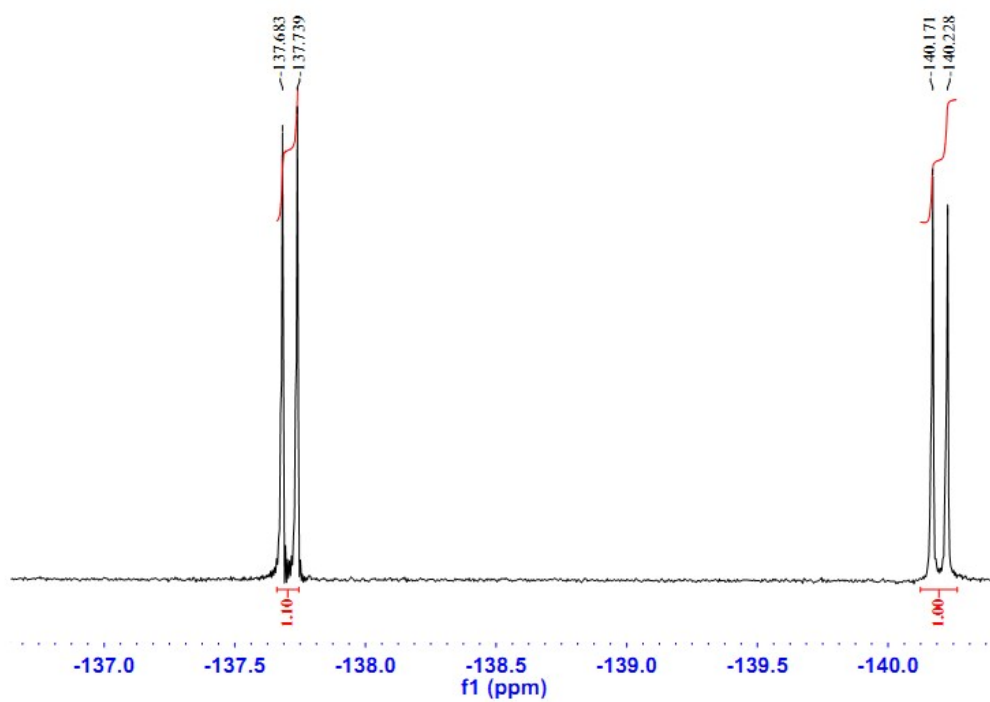

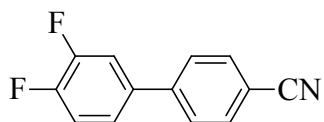

**3',4'-Difluoro-[1,1'-biphenyl]-4-carbonitrile:**  $^1\text{H}$  NMR (400 MHz,  $\text{CDCl}_3$ ):  $\delta_{\text{H}}$  = 7.78-7.76 (d,  $J$  = 8 Hz, 2H), 7.67-7.65 (d,  $J$  = 8 Hz, 2H), 7.46-7.41 (m, 1H), 7.38-7.34 (m, 1H), 7.32-7.28 (m, 1H) ppm.

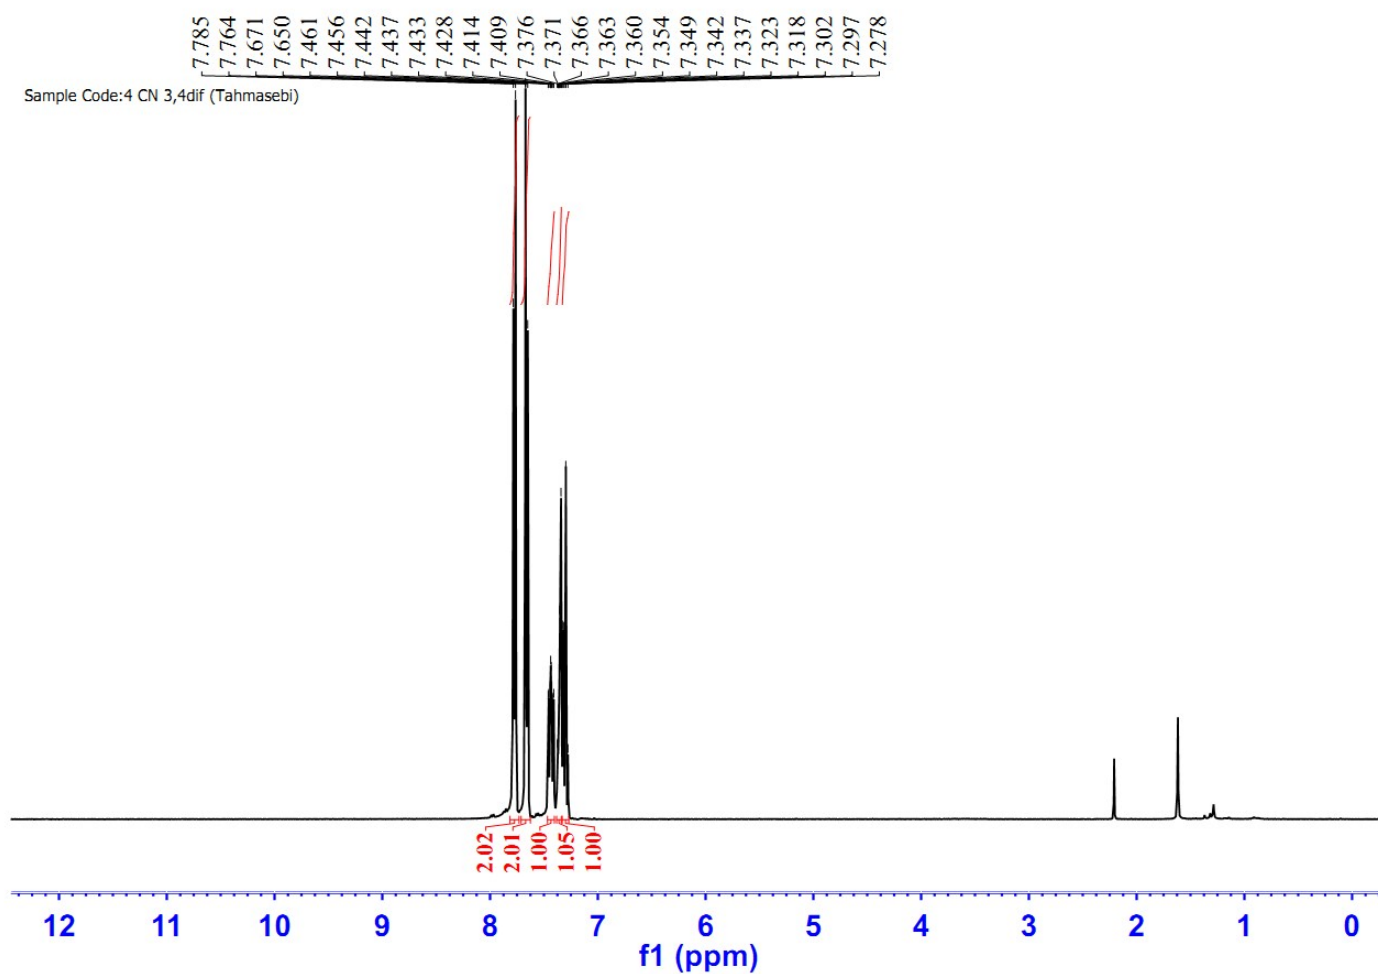



**3',4'-Difluoro-[1,1'-biphenyl]-4-carbonitrile:**  $^{13}\text{C}$  NMR (100 MHz,  $\text{CDCl}_3$ ):  $\delta$ = 151.9, 149.6, 143.5, 136.2, 132.8, 127.6, 123.4, 123.4, 123.4, 123.3, 118.7, 118.2, 118.0, 116.4, 116.2, 111.6 ppm.

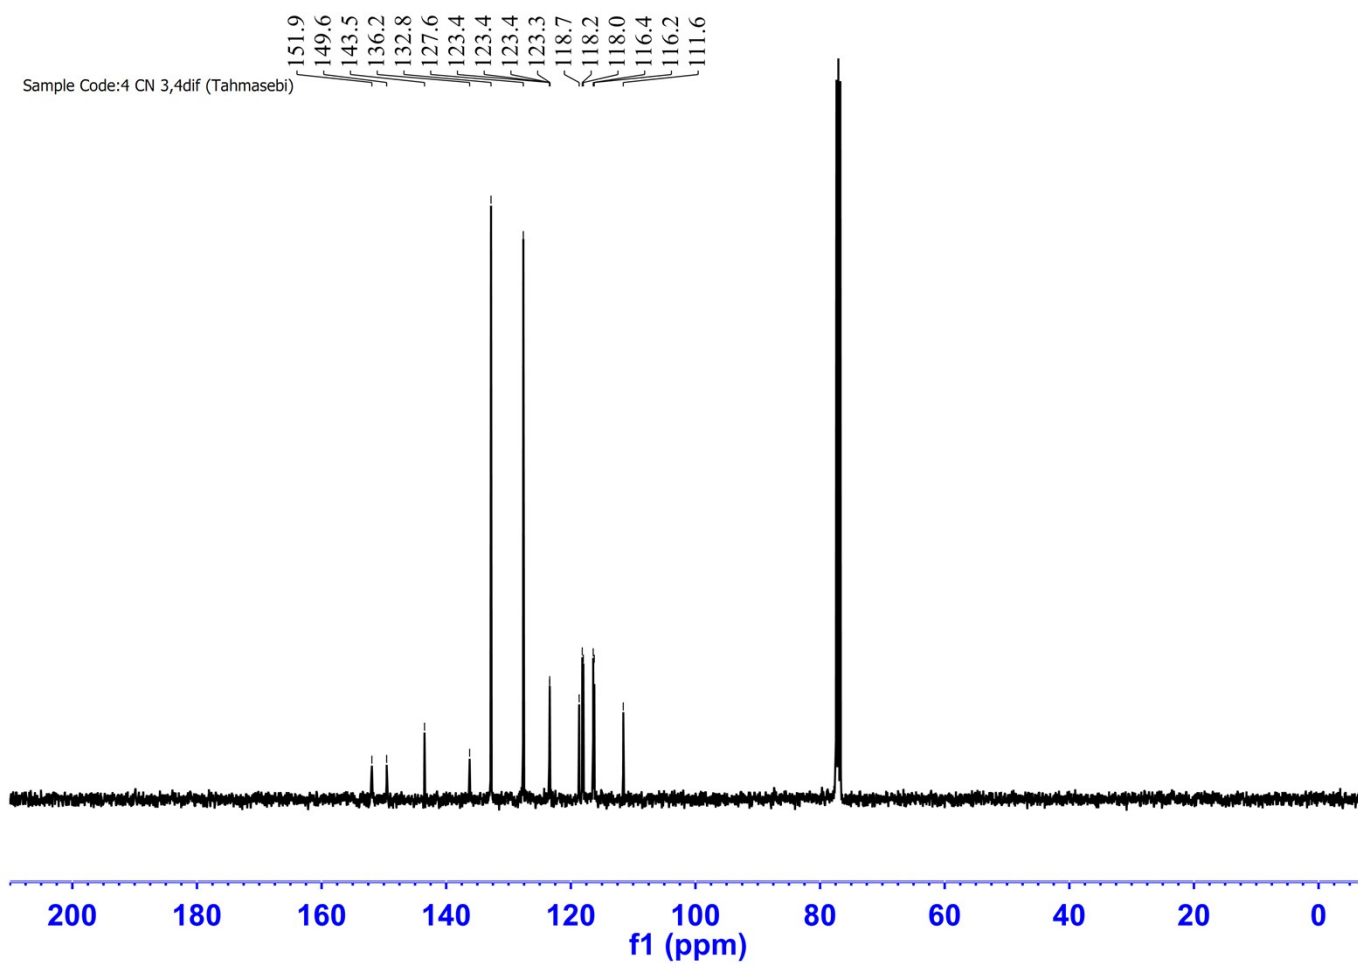

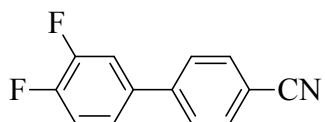

**3',4'-Difluoro-[1,1'-biphenyl]-4-carbonitrile:**  $^{19}\text{F}$  NMR (400 MHz,  $\text{CDCl}_3$ ):  $\delta_{\text{H}} = -136.4$  (d, 1F),  $-137.6$  (d, 1F)ppm.

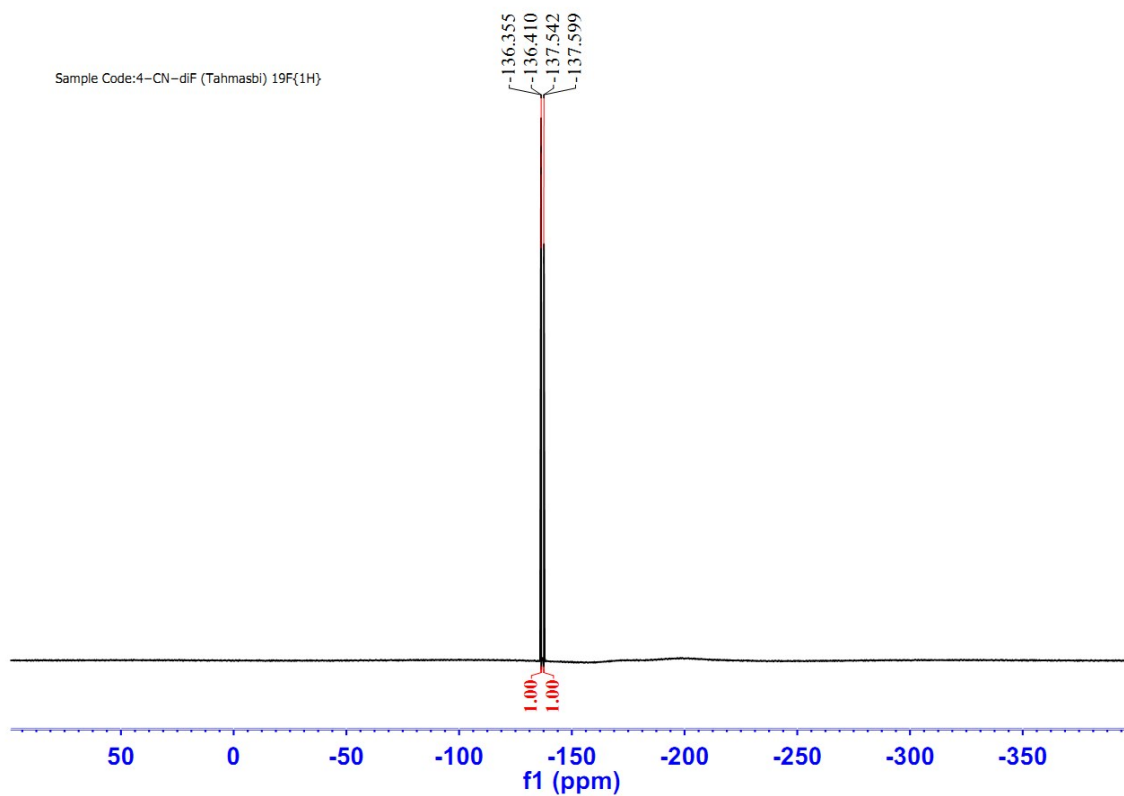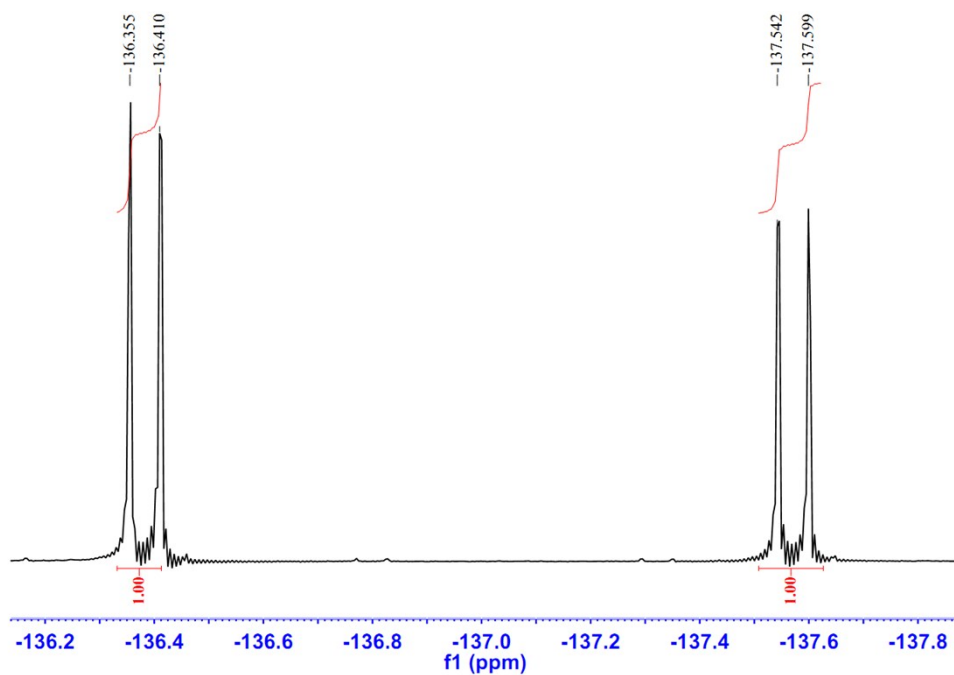

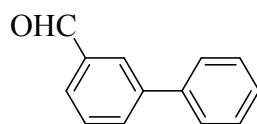

**[1,1'-Biphenyl]-3-carbaldehyde:**  $^1\text{H}$  NMR (400 MHz,  $\text{CDCl}_3$ ):  $\delta_{\text{H}}$  = 10.14 (s, 1H), 8.42 (s, 1H), 8.17-8.15 (d,  $J$  = 8Hz, 1H), 7.9-7.88 (t,  $J$  = 8Hz, 1H), 7.70-7.66 (m, 2H), 7.63-7.58 (q,  $J$  = 8 Hz, 1H), 7.54-7.50 (t,  $J$  = 8 Hz, 2H), 7.46-7.42 (m, 1H) ppm.

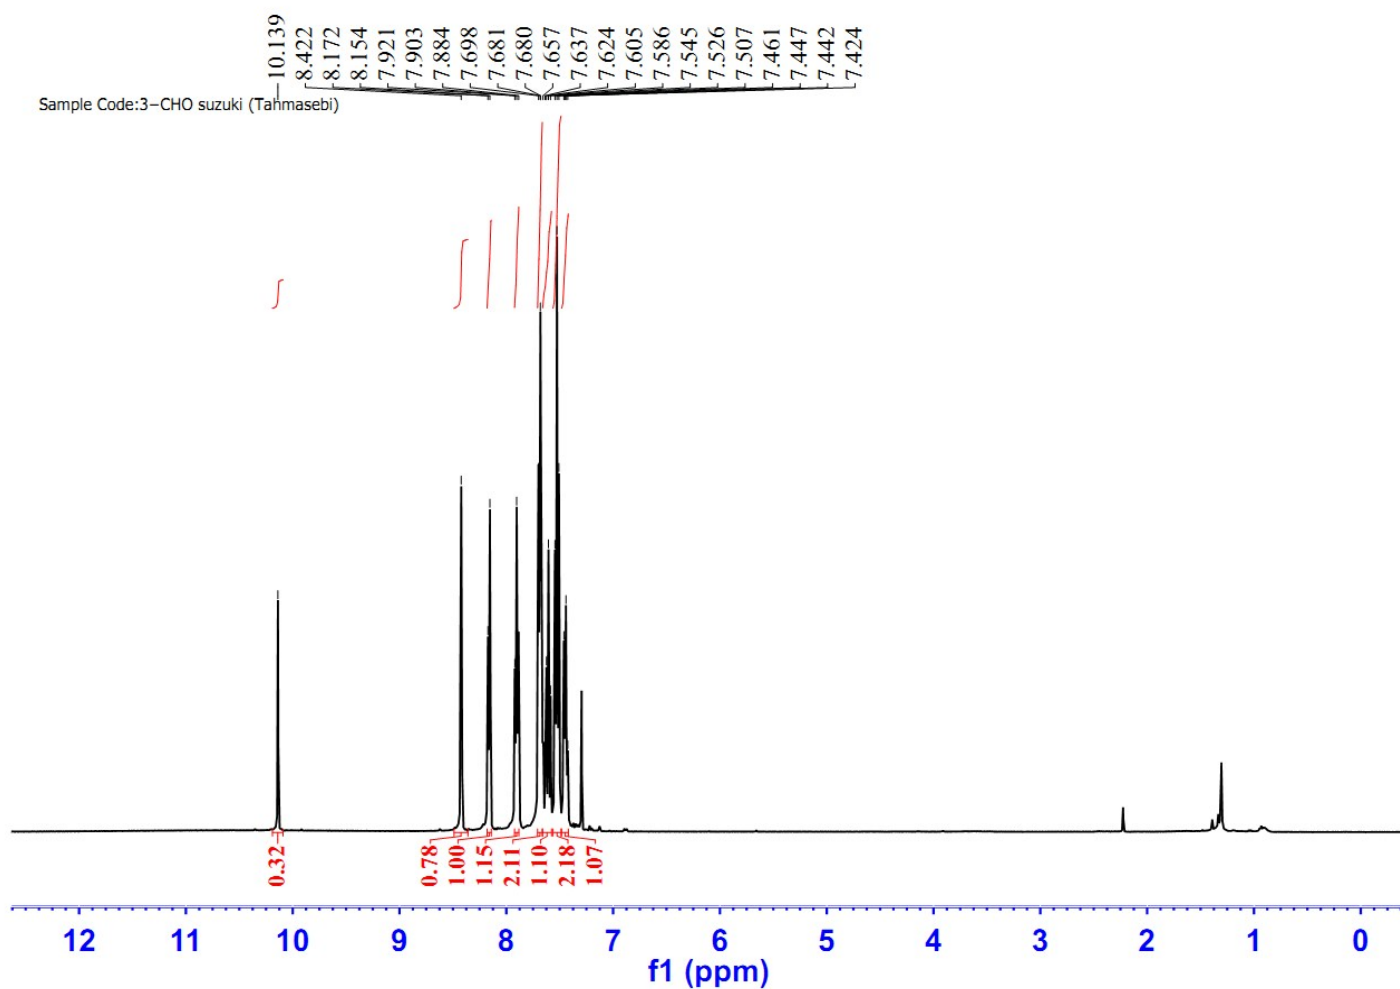



**[1,1'-Biphenyl]-3-carbaldehyde:**  $^{13}\text{C}$  NMR (100 MHz,  $\text{CDCl}_3$ ):  $\delta$  = 192.5, 141.6, 139.9, 132.5, 129.9, 129.0, 129.0, 128.9, 128.0, 127.9, 127.2 ppm.

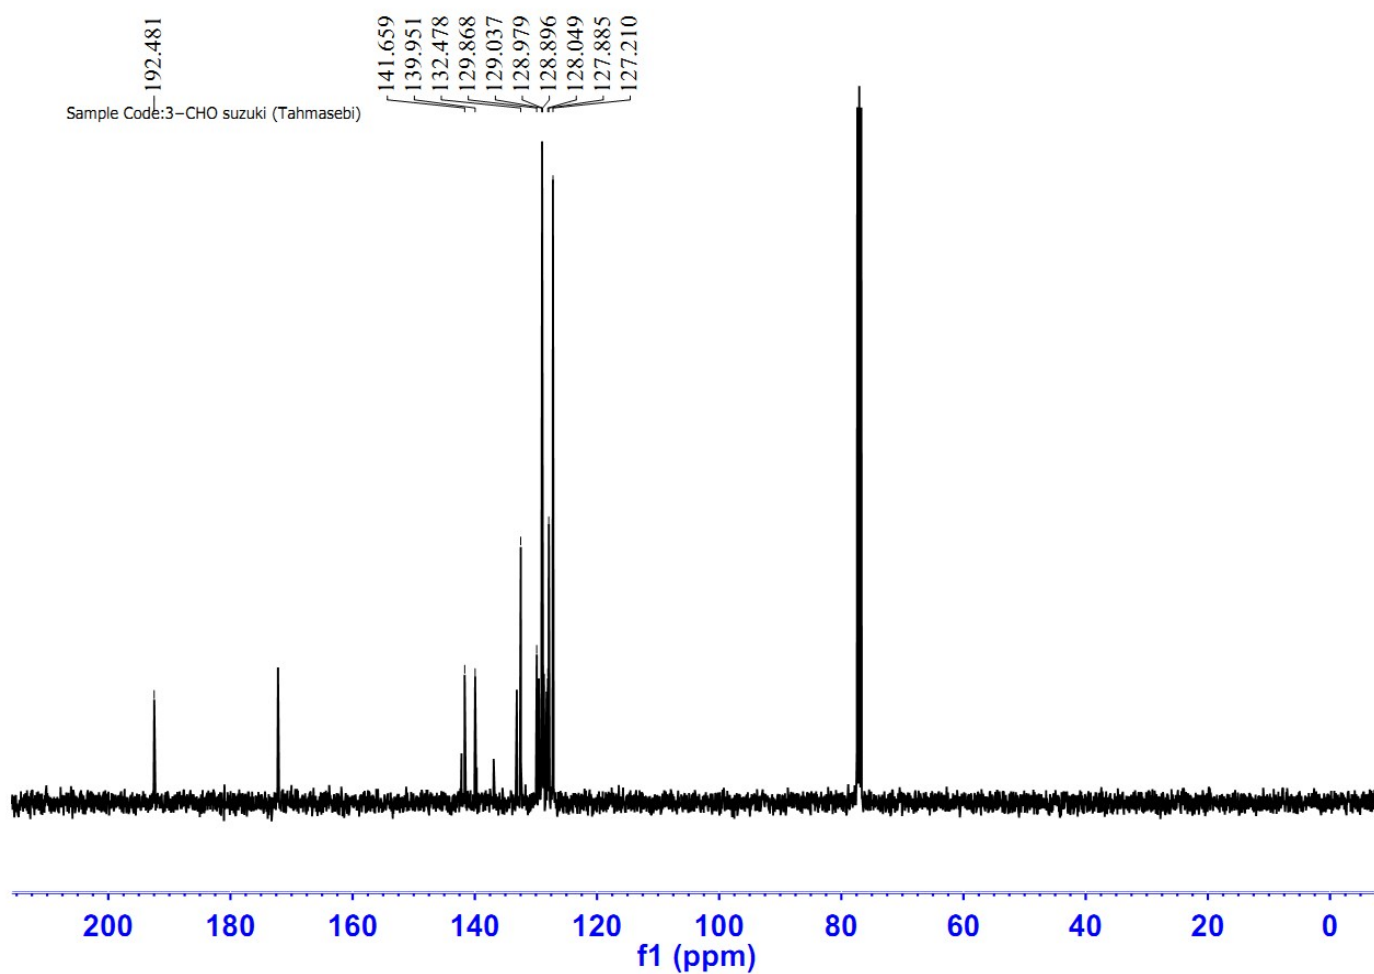

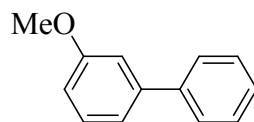

**3-Methoxy-1,1'-biphenyl:**  $^1\text{H}$  NMR (400 MHz,  $\text{CDCl}_3$ ):  $\delta_{\text{H}}$  = 7.64-7.62 (d,  $J$  = 8 Hz, 2H), 7.49-7.45 (t,  $J$  = 8 Hz, 2H), 7.42-7.37 (six,  $J$  = 4 Hz, 2H), 7.23-7.21 (d,  $J$  = 8 Hz, 1H), 7.17-7.15 (t,  $J$  = 4 Hz, 1H), 6.95-6.92 (dd,  $J$  = 8 Hz,  $J$  = 4 Hz, 1H), 3.91 (s, 3H) ppm.

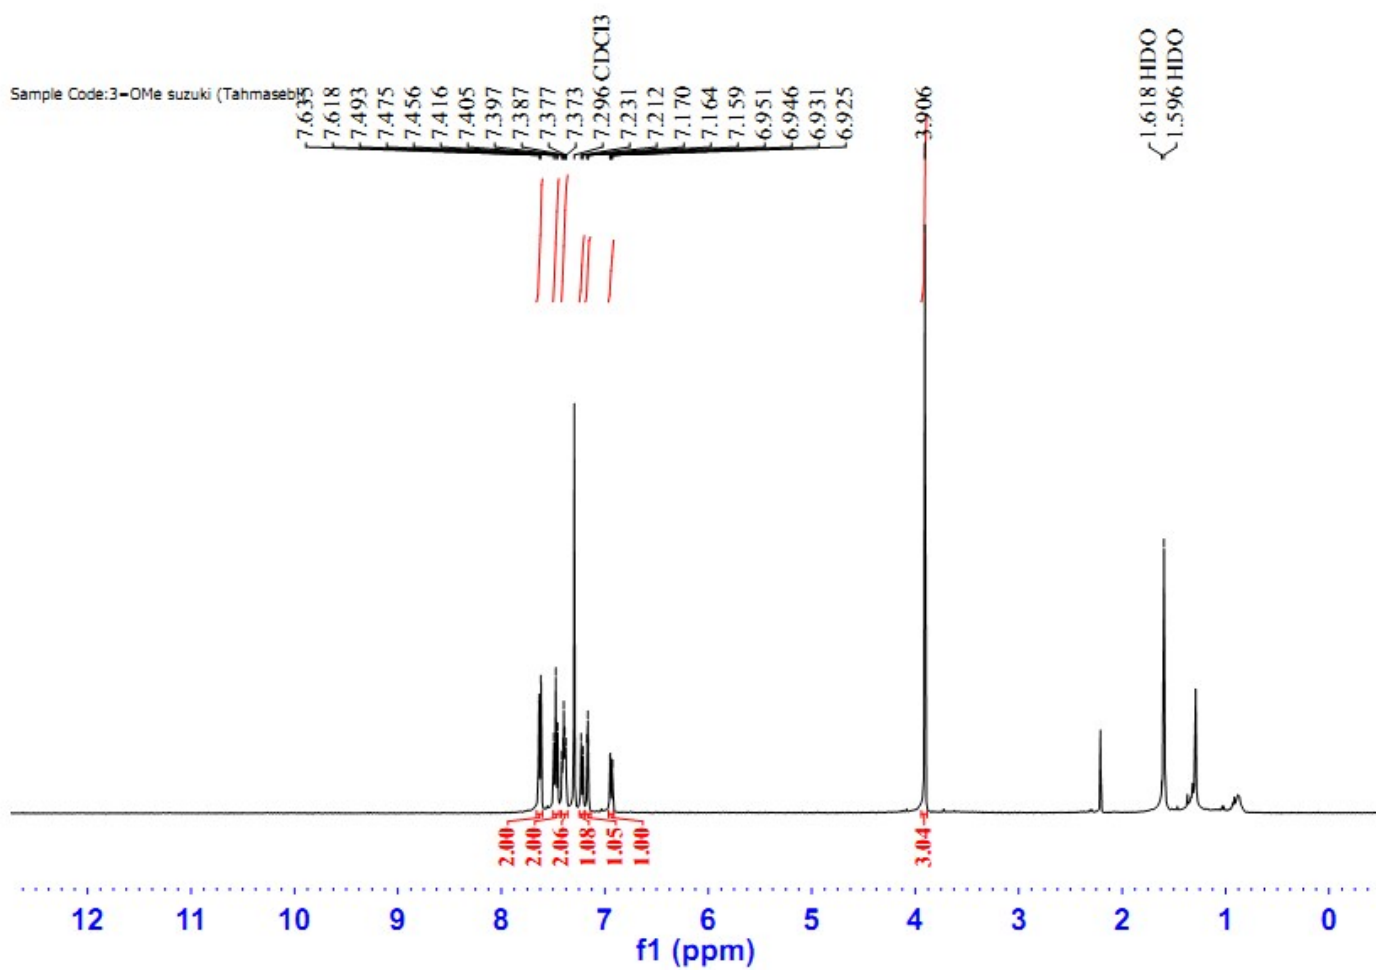

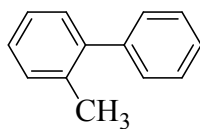

**2-Methyl-1,1'-biphenyl:**  $^1\text{H}$  NMR (400 MHz,  $\text{CDCl}_3$ ):  $\delta_{\text{H}} = 7.51\text{--}7.47$  (t,  $J = 8\text{ Hz}$ , 3H),  $7.44\text{--}7.40$  (t,  $J = 8\text{ Hz}$ , 3H),  $7.35\text{--}7.32$  (m, 3H),  $2.36$  (s, 3H) ppm.

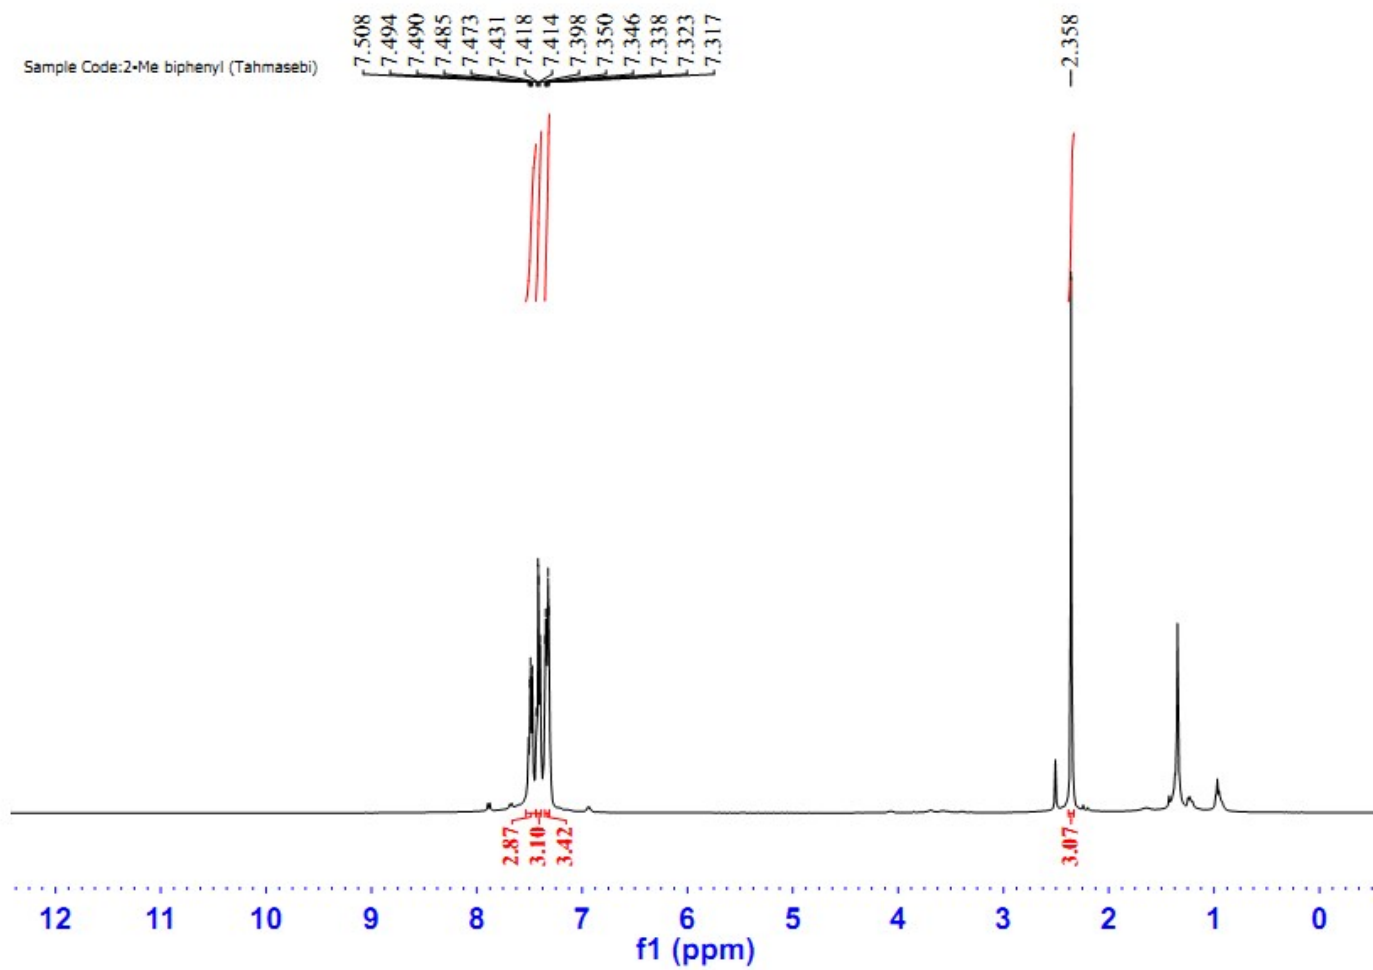

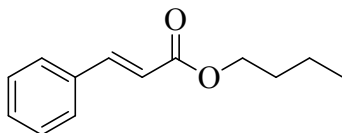

**Butyl cinnamate:**  $^1\text{H}$  NMR (400 MHz,  $\text{CDCl}_3$ ):  $\delta_{\text{H}}$  = 7.74-7.70 (d,  $J$  = 16 Hz, 1H), 7.57-7.55 (m, 2H), 7.42-7.40 (t,  $J$  = 4 Hz, 3H), 6.50-6.46 (d,  $J$  = 16 Hz, 1H), 4.27-4.23 (t,  $J$  = 8 Hz, 2H), 1.77-1.69 (quint,  $J$  = 8 Hz, 2H), 1.52-1.43 (sextet,  $J$  = 8 Hz, 2H), 1.02-0.98 (t,  $J$  = 8 Hz, 3H) ppm.

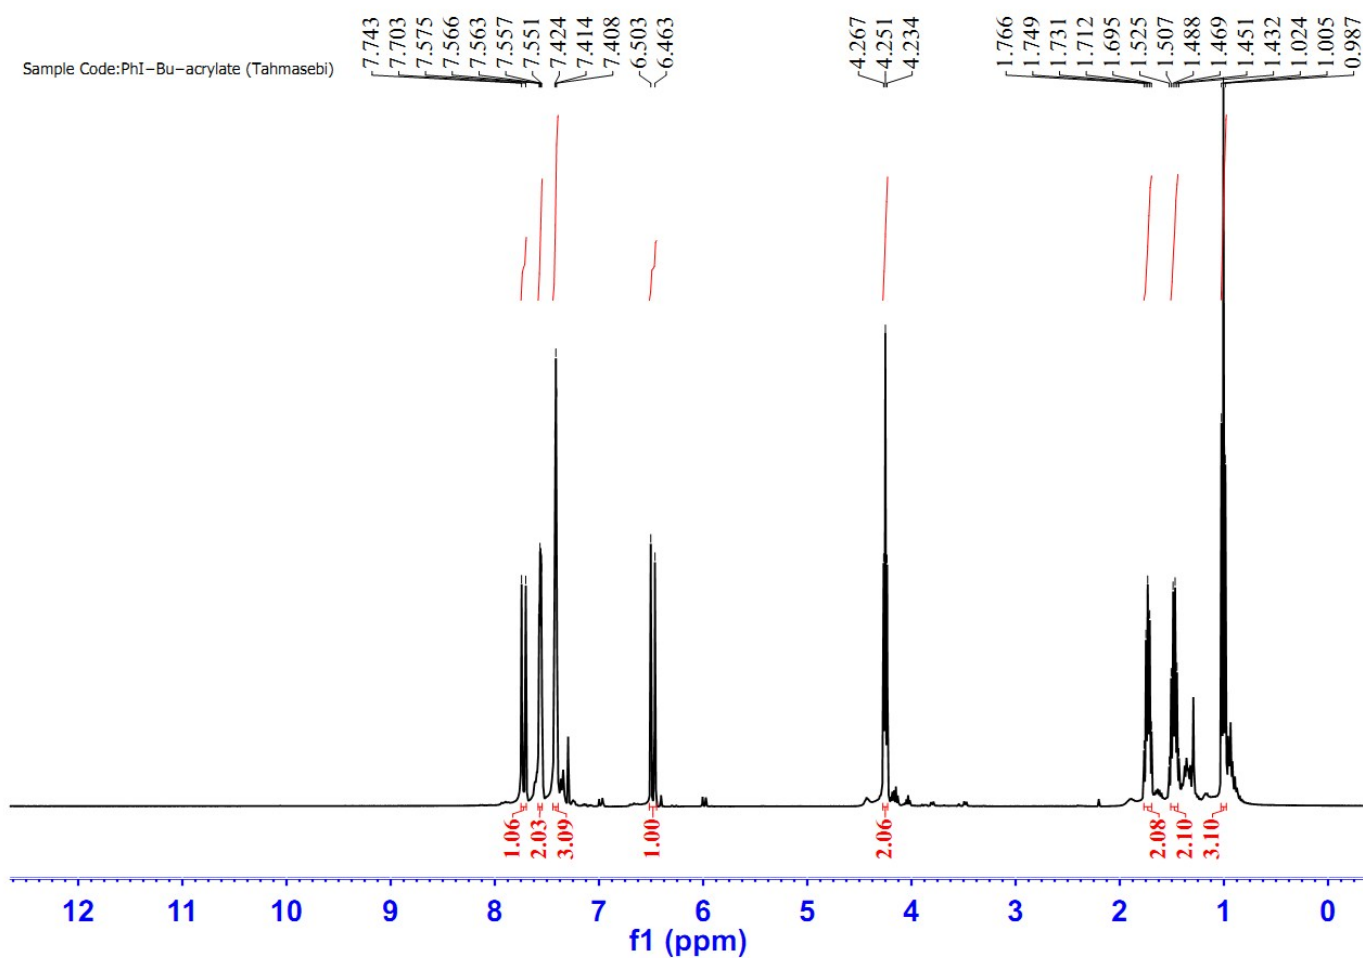

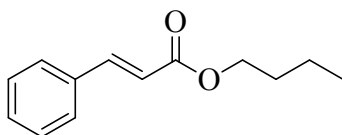

**Butyl cinnamate:**  $^{13}\text{C}$  NMR (100 MHz,  $\text{CDCl}_3$ ):  $\delta$ =167.1, 144.6, 134.5, 130.2, 128.9, 128.1, 118.3, 64.4, 30.8, 19.2, 13.8 ppm.

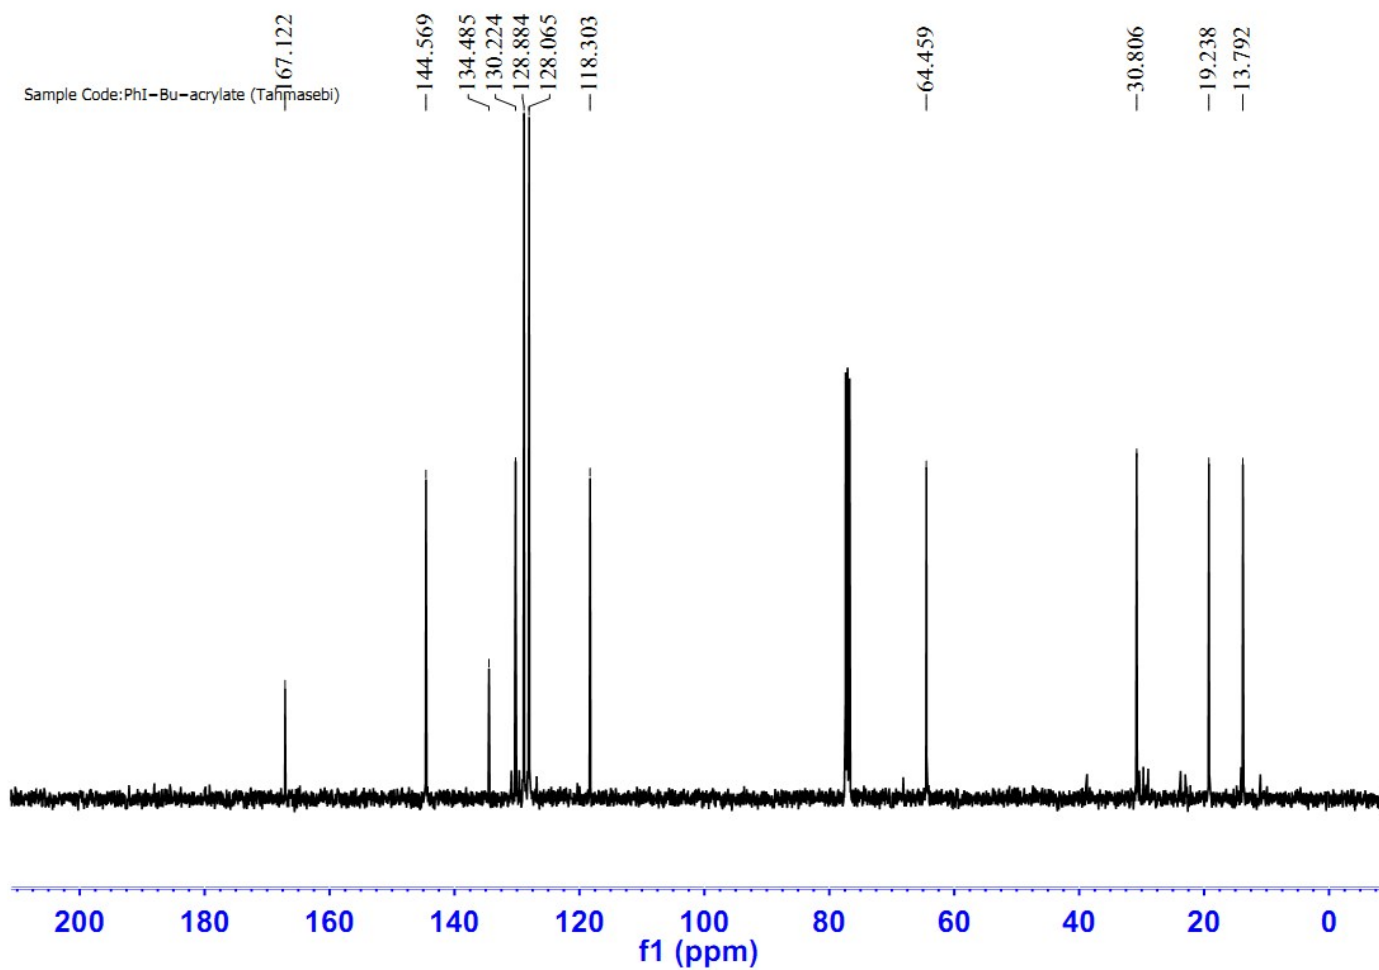

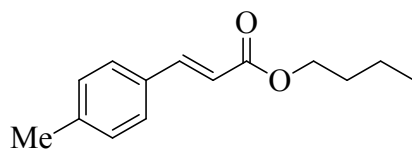

**Butyl 3-(4-methylphenyl)acrylate:**  $^1\text{H}$  NMR (400 MHz,  $\text{CDCl}_3$ ):  $\delta_{\text{H}}$  = 7.72-7.68 (d,  $J$  = 16 Hz, 1H), 7.48-7.45 (d,  $J$  = 12 Hz, 2H), 7.23-7.21 (d,  $J$  = 8 Hz, 2H), 6.45-6.41 (d,  $J$  = 16 Hz, 1H), 4.26-4.22 (t,  $J$  = 8 Hz, 2H), 2.40 (s, 3H), 1.76-1.69 (quint,  $J$  = 8 Hz, 2H), 1.52-1.43 (sextet,  $J$  = 8 Hz, 2H), 1.02-0.98 (t,  $J$  = 8 Hz, 3H) ppm.

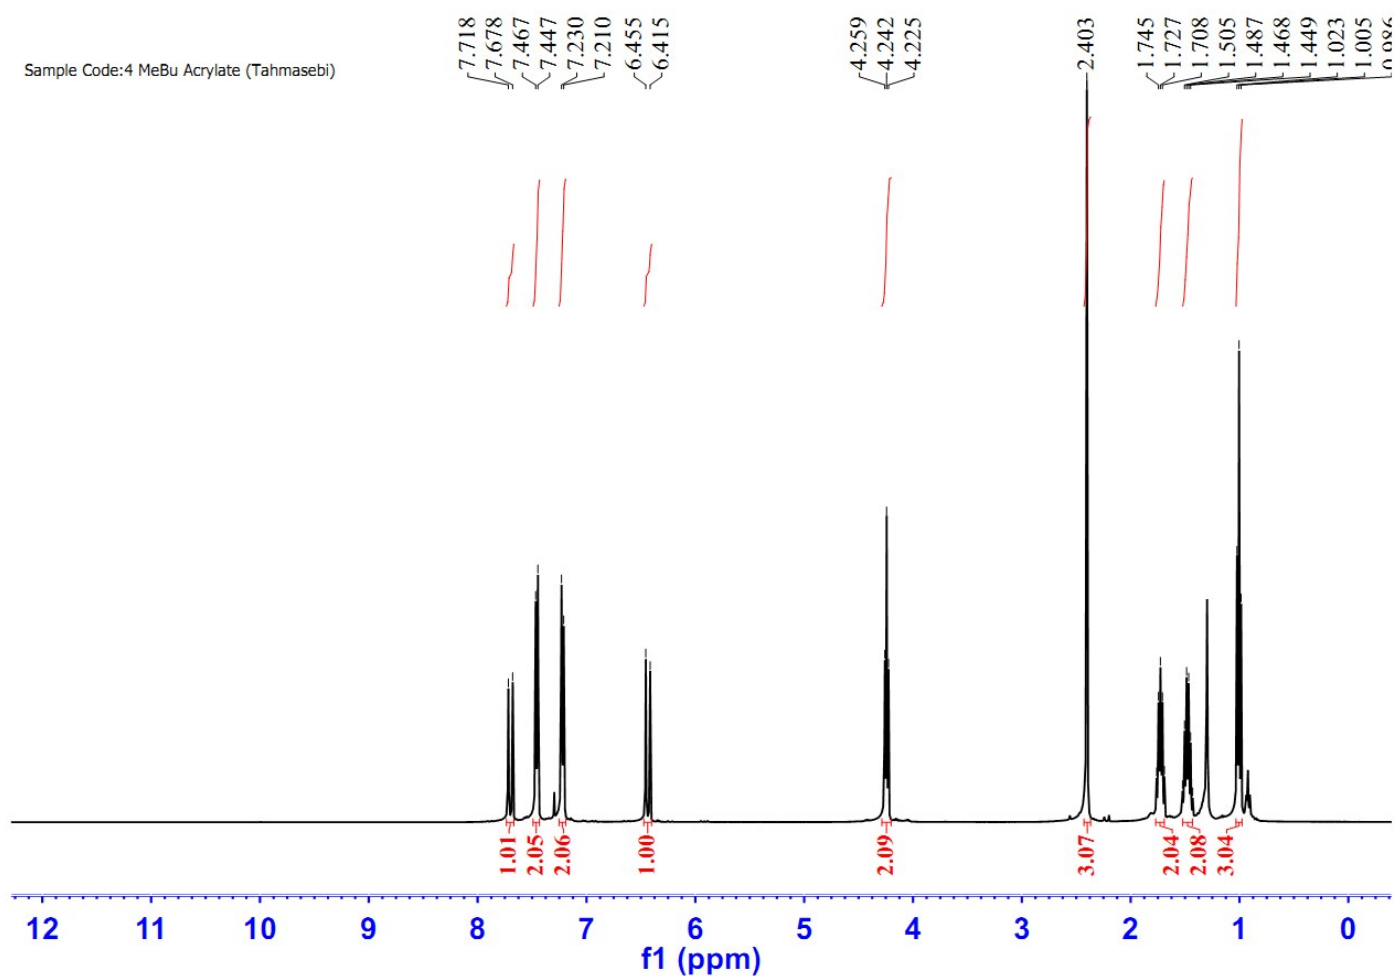



**Butyl 3-(4-methylphenyl)acrylate:**  $^{13}\text{C}$  NMR (100 MHz,  $\text{CDCl}_3$ ):  $\delta$ =167.3, 144.6, 140.6, 131.7, 129.6, 128.1, 117.2, 64.4, 30.8, 21.5, 19.3, 13.8 ppm.

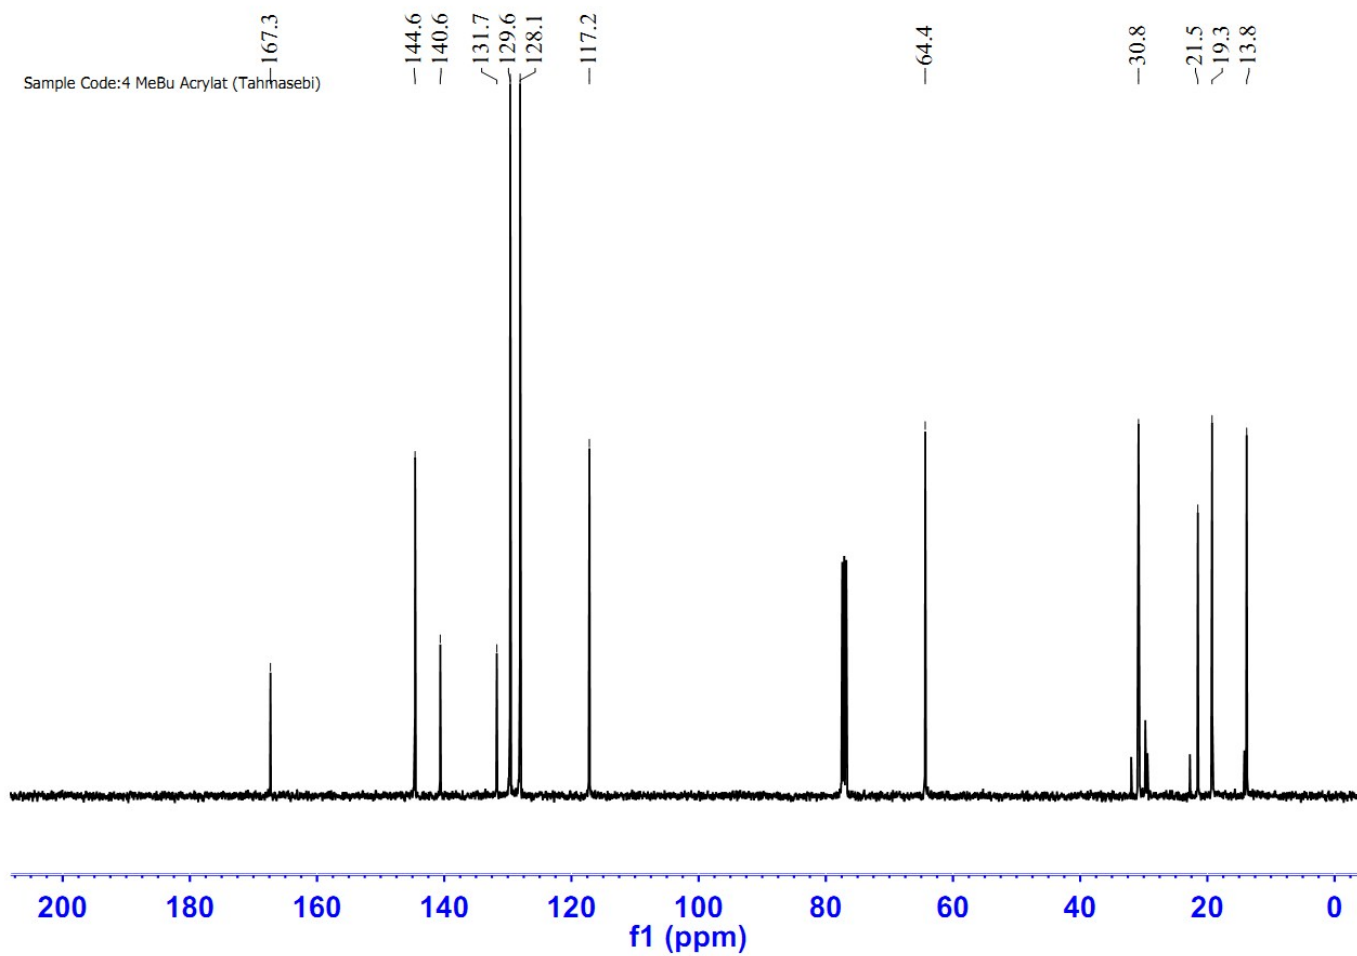

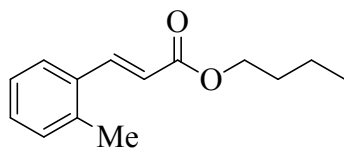

**Butyl 3-(2-methylphenyl)acrylate:**  $^1\text{H}$  NMR (400 MHz,  $\text{CDCl}_3$ ):  $\delta_{\text{H}}$  = 7.803-7.99 (d,  $J$  = 16 Hz, 1H), 7.60-7.58 (d,  $J$  = 8 Hz, 1H), 7.31-7.30 (d,  $J$  = 4 Hz, 1H), 7.26-7.2 (t,  $J$  = 8 Hz, 2H), 6.42-6.38 (d,  $J$  = 16 Hz, 1H), 4.27-4.23 (t,  $J$  = 8 Hz, 2H), 2.48 (s, 3H), 1.77-1.70 (quint,  $J$  = 8 Hz, 2H), 1.53-1.43 (sextet,  $J$  = 8 Hz, 2H), 1.02-0.98 (t,  $J$  = 8 Hz, 3H) ppm.

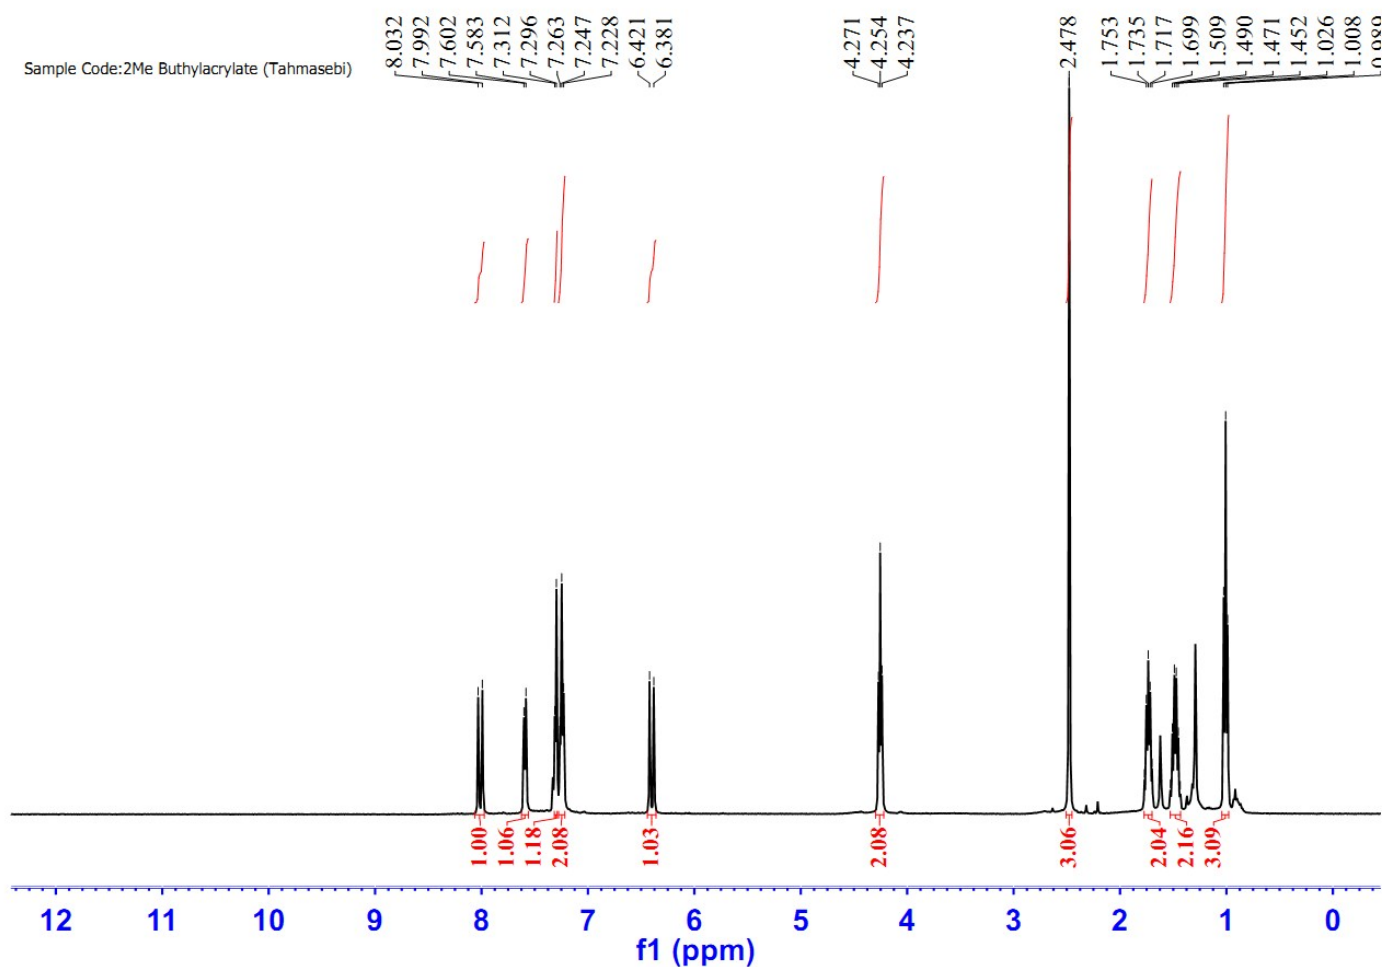

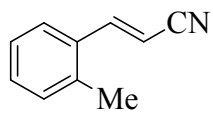

**3-(o-Tolyl)acrylonitrile:**  $^1\text{H}$  NMR (400 MHz,  $\text{CDCl}_3$ ):  $\delta_{\text{H}}$  = 7.75-7.71 (d,  $J$  = 16 Hz, 1H), 7.50-7.49 (d,  $J$  = 4 Hz, 1H), 7.38-7.34 (d,  $J$  = 8 Hz, 1H), 7.33-7.29 (m, 1H), 7.27-7.25 (d,  $J$  = 8 Hz, 1H), 5.86-5.82 (d,  $J$  = 16 Hz, 1H), 2.44 (s, 3H) ppm.

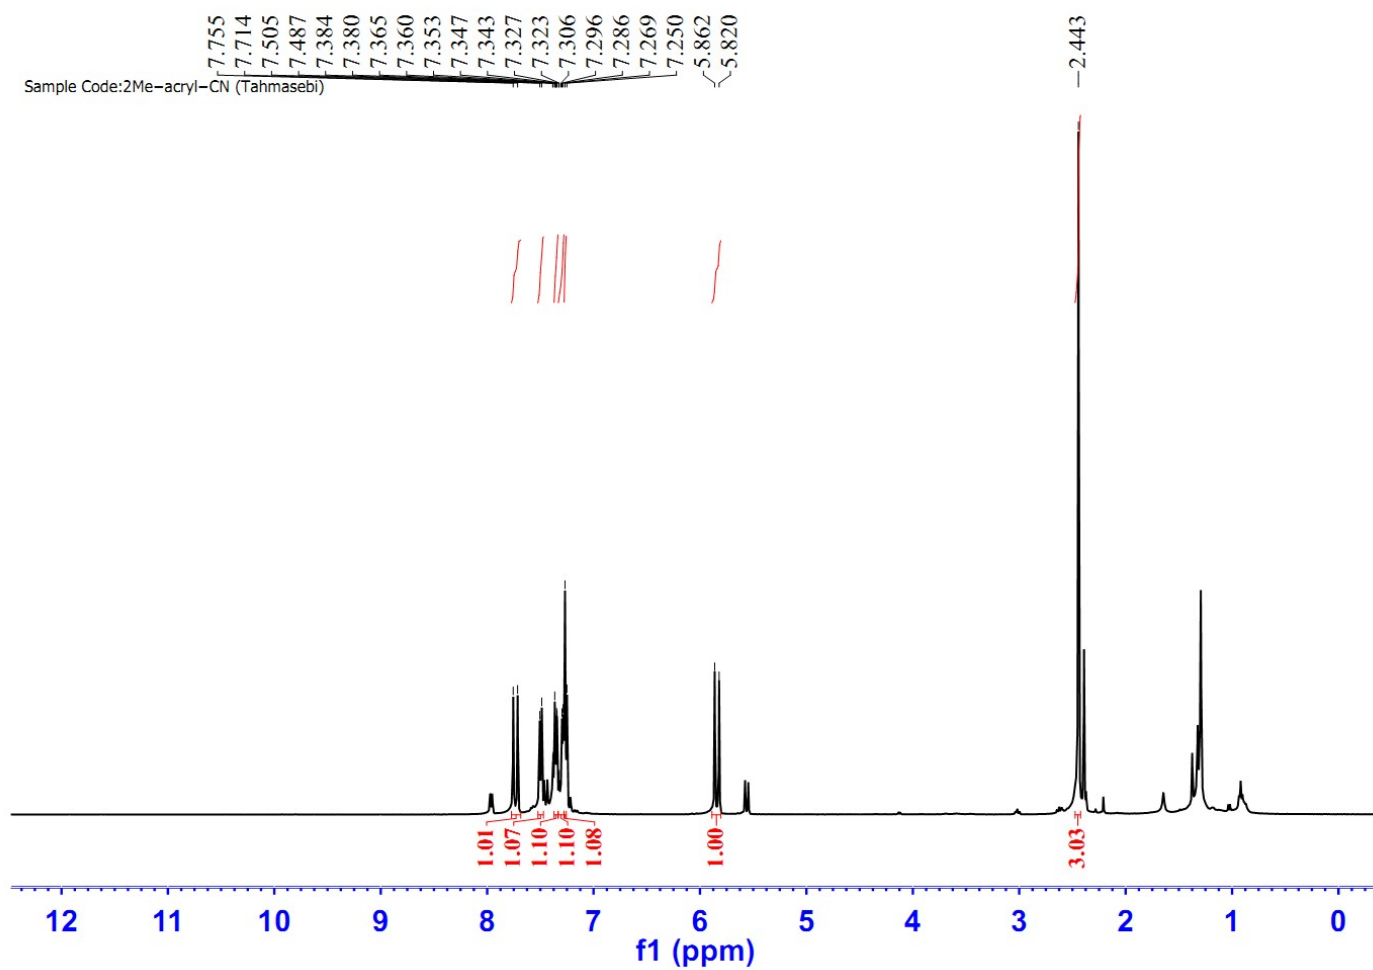



**3-(o-Tolyl)acrylonitrile:**  $^{13}\text{C}$  NMR (100 MHz,  $\text{CDCl}_3$ ):  $\delta$ =148.5, 132.6, 131.1, 131.0, 130.6, 126.6, 125.6, 118.4, 97.2, 19.6 ppm.

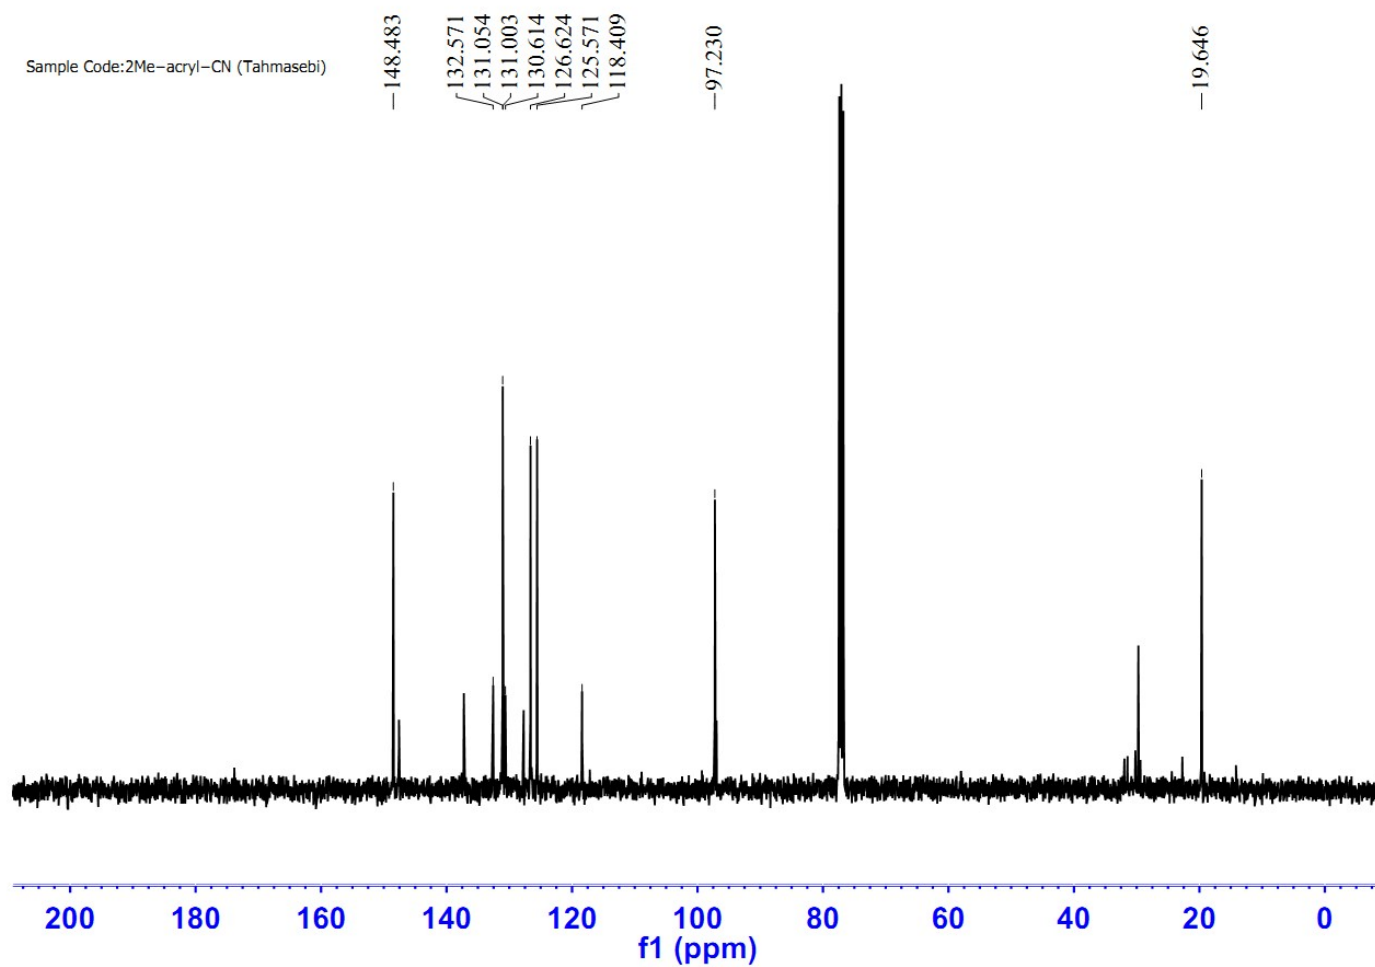

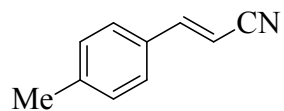

**3-(p-Tolyl)acrylonitrile:**  $^1\text{H}$  NMR (400 MHz,  $\text{CDCl}_3$ ):  $\delta_{\text{H}}$  = 7.42-7.38 (d,  $J$  = 16 Hz, 1H), 7.37-7.36 (d,  $J$  = 4 Hz, 2H), 7.26-7.24 (d,  $J$  = 8 Hz, 2H), 5.87-5.83 (d,  $J$  = 16 Hz, 1H), 2.42 (s, 3H) ppm.

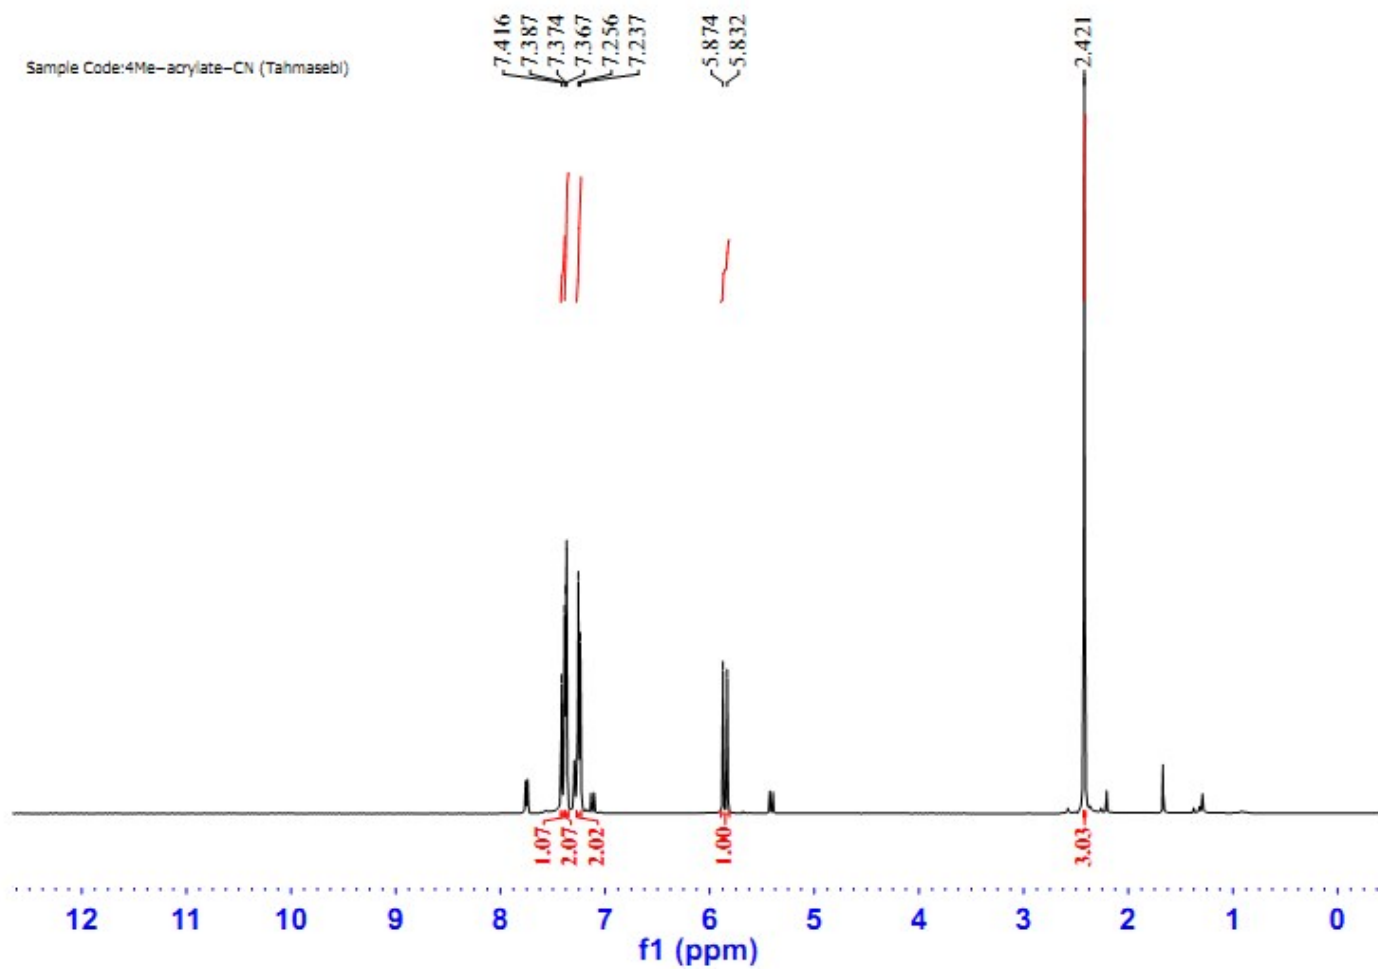

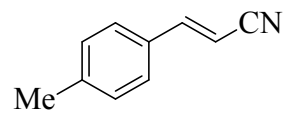

**3-(p-Tolyl)acrylonitrile:**  $^{13}\text{C}$  NMR (100 MHz,  $\text{CDCl}_3$ ):  $\delta$ =150.5, 141.9, 130.9, 129.8, 127.4, 118.5, 95.1, 21.5 ppm.

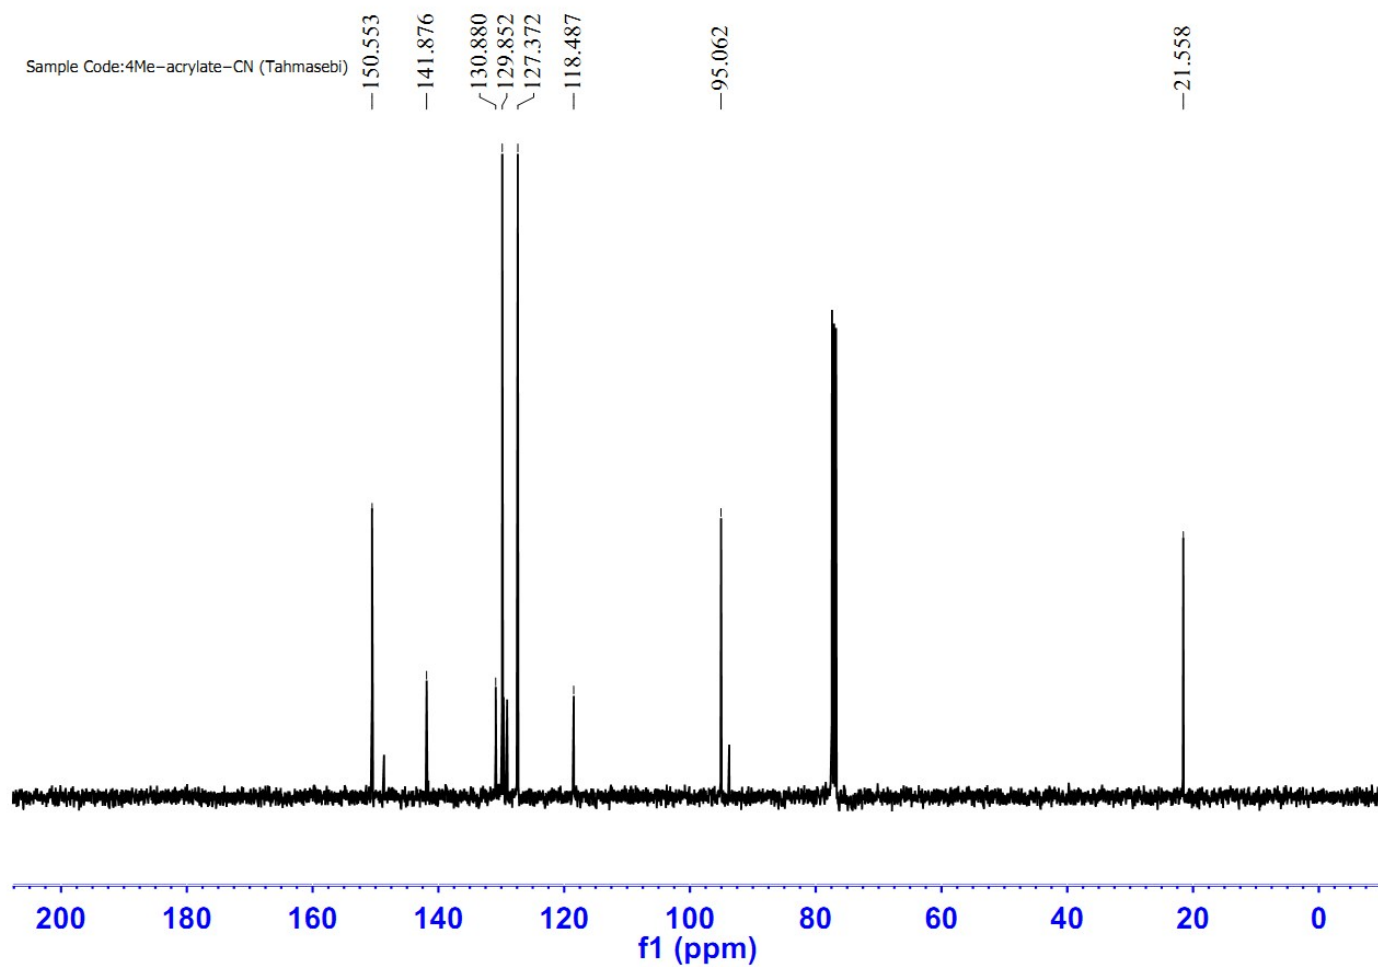

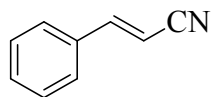

**Cinnamitrile:**  $^1\text{H}$  NMR (400 MHz,  $\text{CDCl}_3$ ):  $\delta_{\text{H}}$  = 7.53-7.41 (m, 6H), 5.94-5.90 (d,  $J$  = 16 Hz, 1H) ppm.

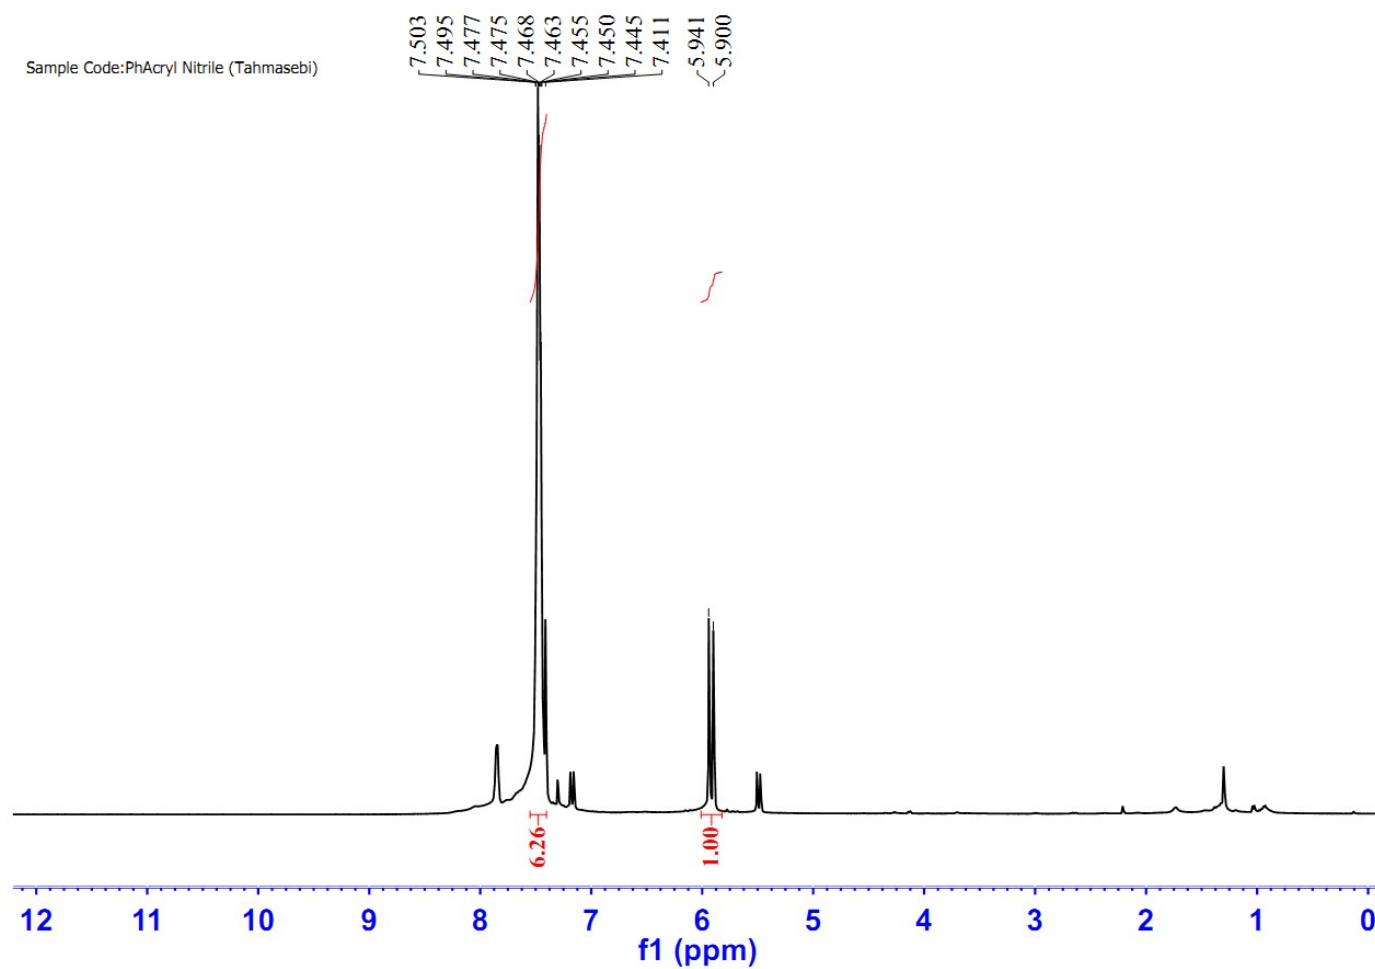

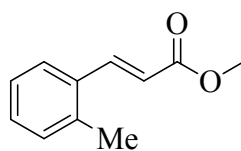

**Methyl 3-(o-tolyl)acrylate:**  $^1\text{H}$  NMR (400 MHz,  $\text{CDCl}_3$ ):  $\delta_{\text{H}}$  = 8.04-8.00 (d,  $J$  = 16 Hz, 1H), 7.59-7.57 (d,  $J$  = 8 Hz, 1H), 7.33-7.29 (t,  $J$  = 8 Hz, 1H), 7.26-7.23 (t,  $J$  = 8 Hz, 2H), 6.42-6.38 (d,  $J$  = 16 Hz, 1H), 3.85 (s, 3H), 2.48 (s, 3H) ppm.

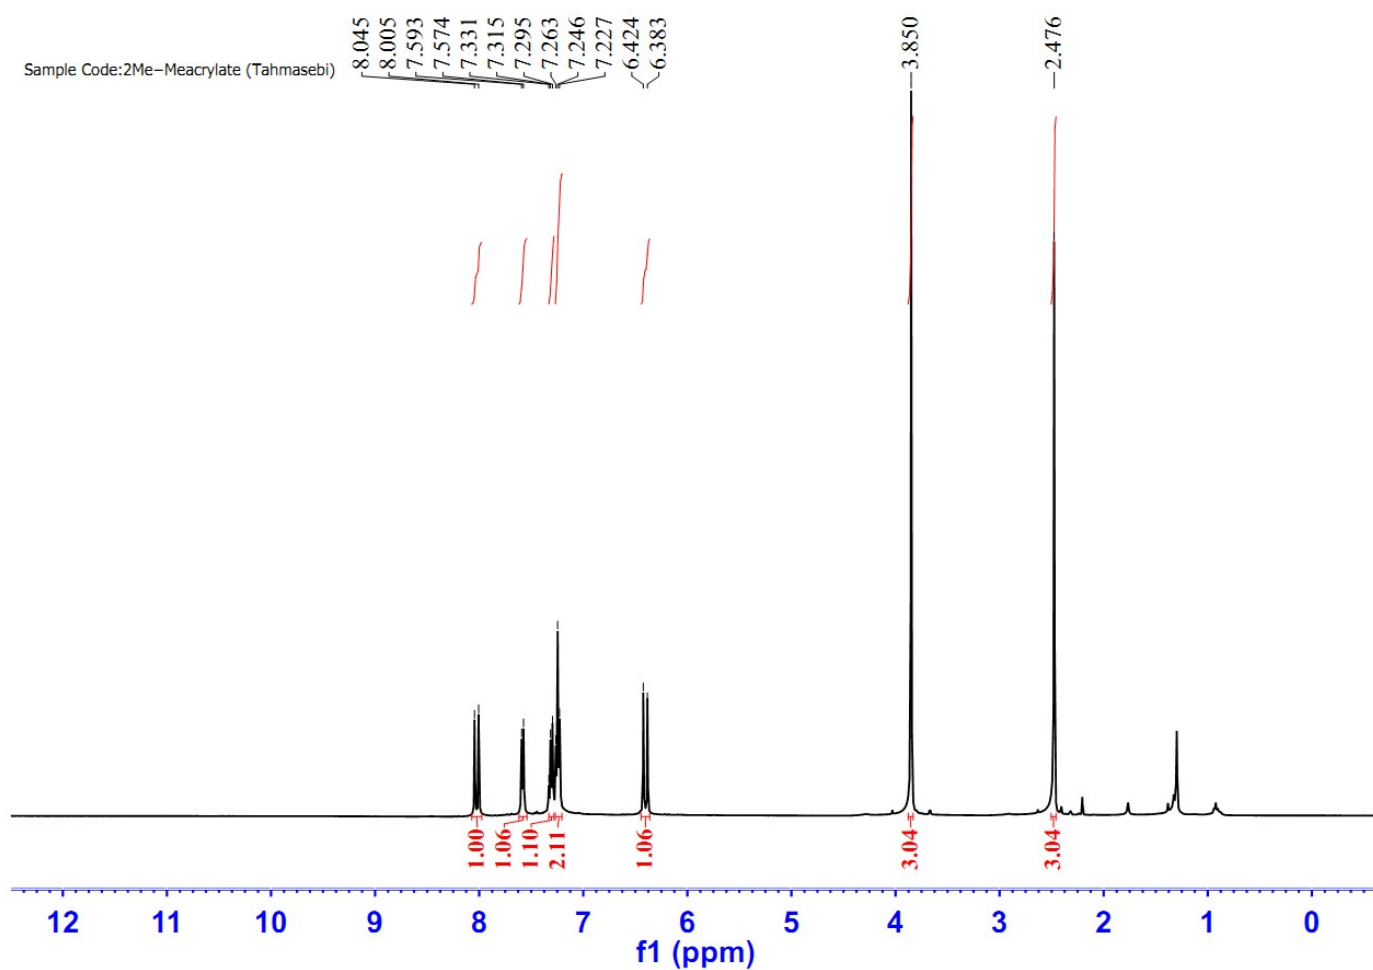



**Methyl 3-(o-tolyl)acrylate:**  $^{13}\text{C}$  NMR (100 MHz,  $\text{CDCl}_3$ ):  $\delta$ =167.5, 142.5, 137.7, 133.4, 130.8, 130.0, 126.4, 126.3, 118.8, 51.7, 19.8 ppm.

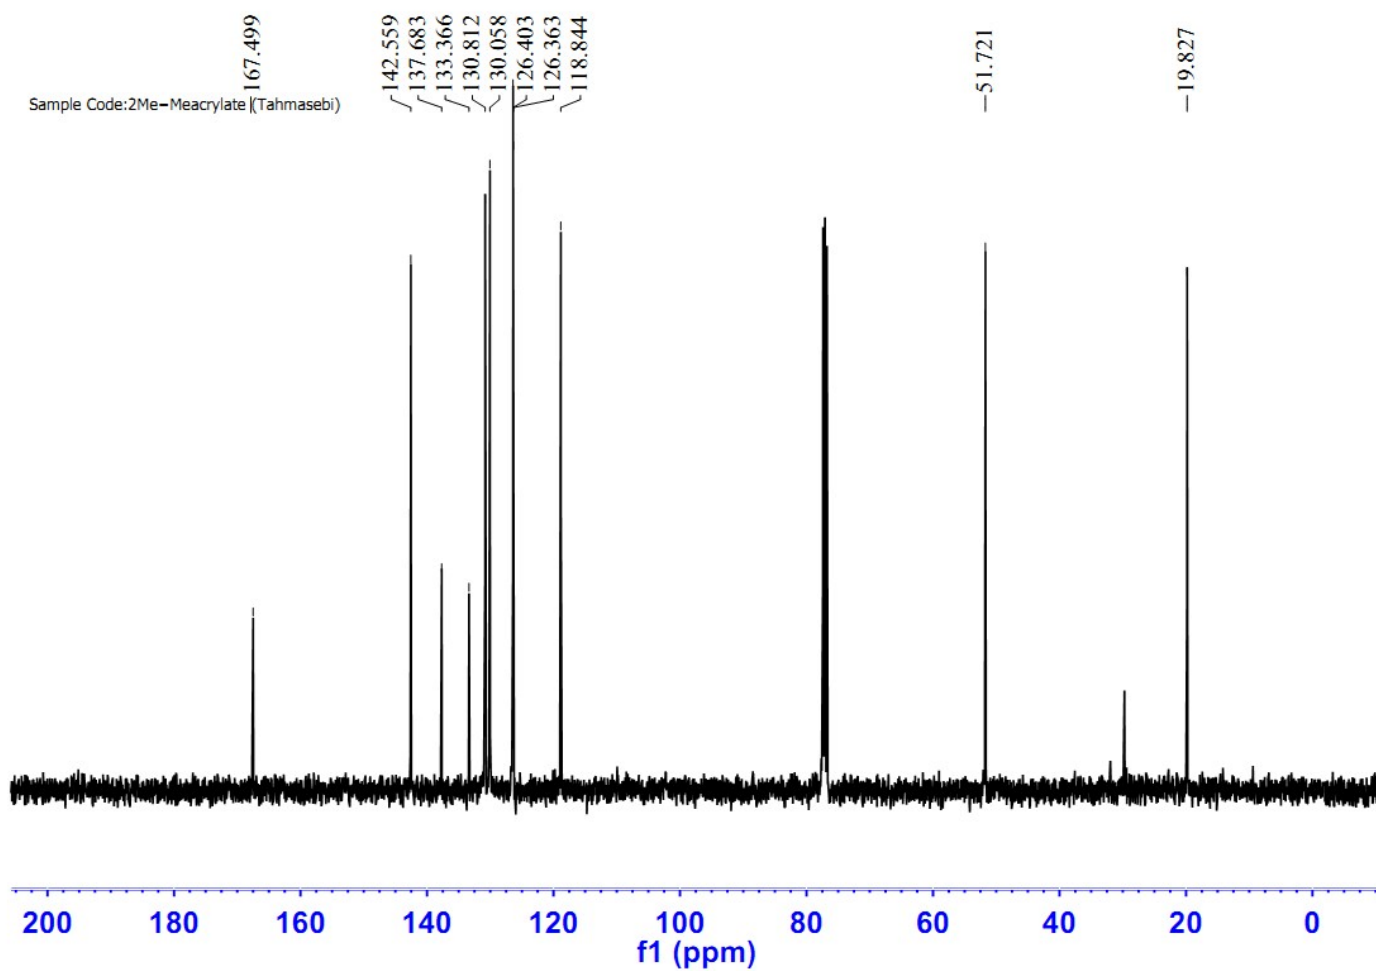

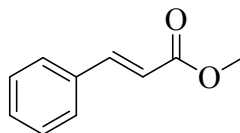

**Methyl cinnamate:**  $^1\text{H}$  NMR (400 MHz,  $\text{CDCl}_3$ ):  $\delta_{\text{H}}$  = 7.75-7.71 (d,  $J$  = 16 Hz, 1H), 7.57-7.54 (m, 2H), 7.43-7.41 (m, 3H), 6.50-6.46 (d,  $J$  = 16 Hz, 1H), 3.84 (s, 3H) ppm.

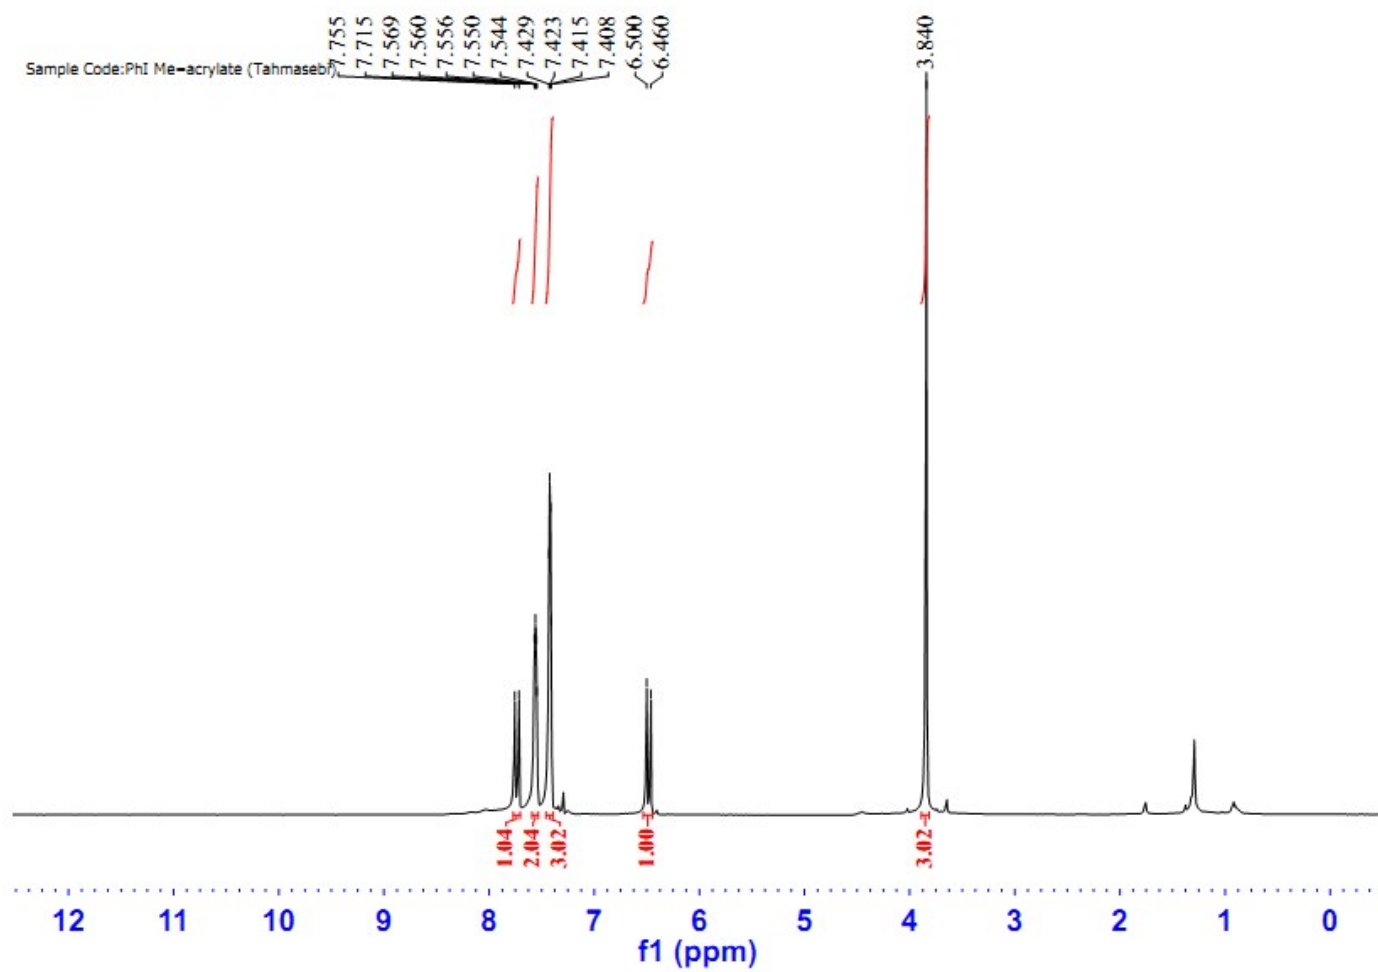

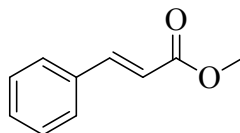

**Methyl cinnamate:**  $^{13}\text{C}$  NMR (100 MHz,  $\text{CDCl}_3$ ):  $\delta$ =167.4, 144.9, 134.4, 130.3, 128.9, 128.1, 117.8, 51.7 ppm.

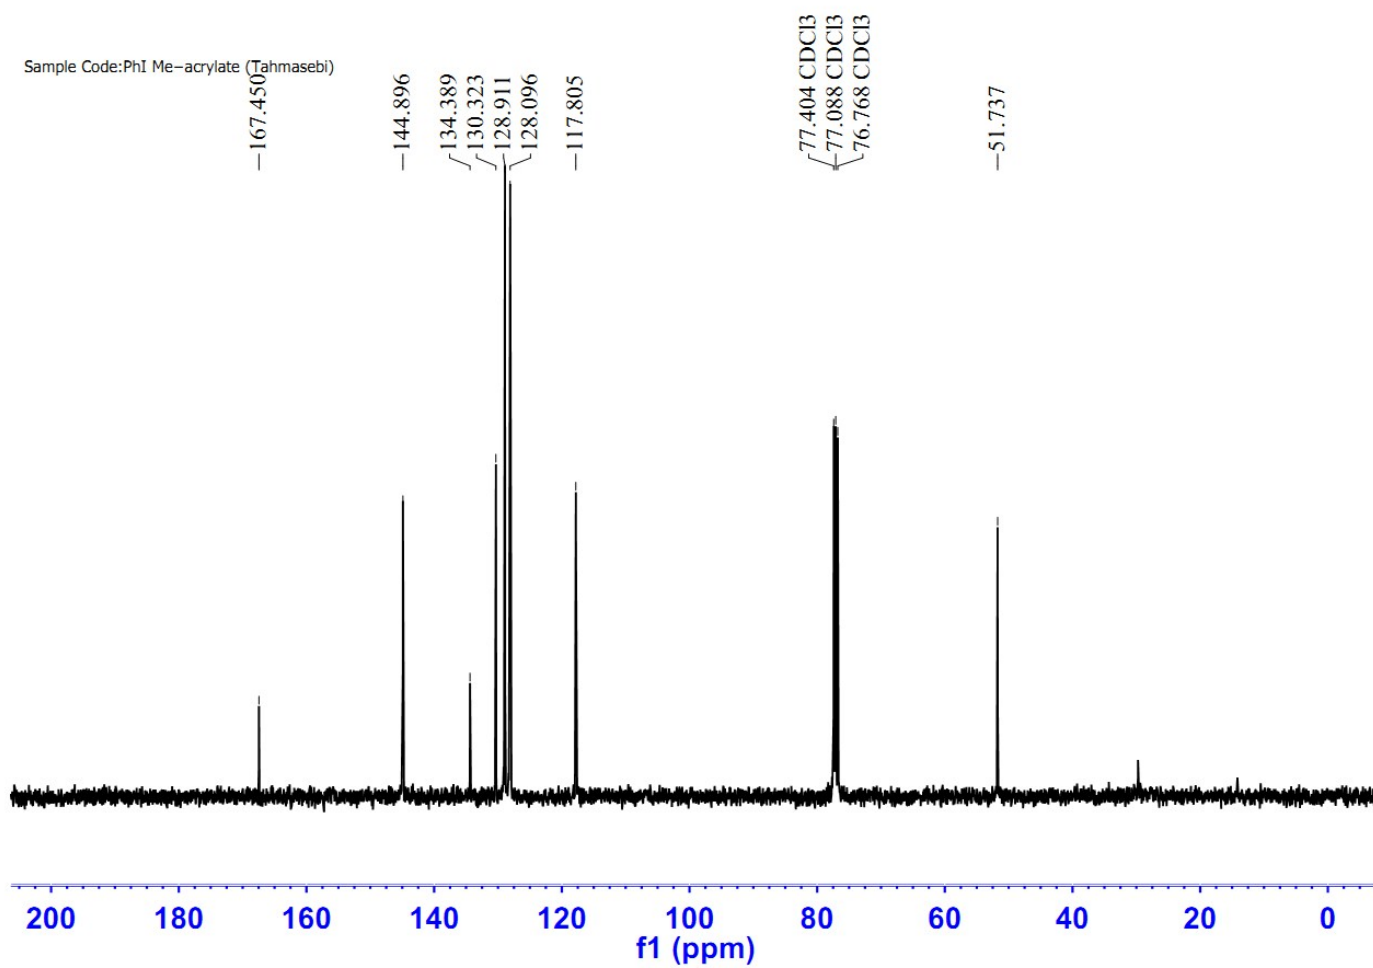

Supplement: c9nj02727k1.pdf [file c9nj02727k1.pdf]
